# Supplementary material for: Copper Foam as Active Catalysts for the Borylation of α, β-Unsaturated Compounds
Source: MDPI journal article supplement (doi:10.3390/ijms23158403), 2022-07-29
Supplement: s1 [file s1]

# Supplementary Information

## Copper Foam as Active Catalysts for the Borylation of $\alpha$ , $\beta$ -Unsaturated Compounds

Kewang Zheng <sup>1,2</sup>, Miao Liu <sup>1</sup>, Zhifei Meng <sup>1</sup>, Zufeng Xiao <sup>1</sup>, Fei Zhong <sup>1,\*</sup>, Wei Wang <sup>1,\*</sup> and Caiqin Qin <sup>1</sup>

<sup>1</sup> College of Chemistry and Materials Science, Hubei Engineering University, Xiaogan 432000, China; kewang1104@126.com (K.Z.); liumiao0727@163.com (M.L.); meng16301@163.com (Z.M.); chemhbeu@163.com (Z.X.); qincq@hbeu.edu.cn (C.Q.)

<sup>2</sup> Hubei Key Laboratory of Biological Resources and Environmental Biotechnology, Wuhan University, Wuhan 430079, China

\* Correspondence: zhong4536188@hbeu.edu.cn (F.Z.); weiwang@hbeu.edu.cn (W.W.)

### Table of Contents

|                                                                                                   |    |
|---------------------------------------------------------------------------------------------------|----|
| 1. Table S1 The atomic percentage of copper foam                                                  | 1  |
| 2. Characterization data for products (2a, 3aa, 3a-3y)                                            | 2  |
| 3. Figures S1–S27 <sup>1</sup> H NMR and <sup>13</sup> C NMR spectra of products (2a, 3aa, 3a-3y) | 10 |

**Table S1.** The atomic percentage of copper foam.

|    |                        | copper<br>foam | copper foam<br>(after<br>one<br>reaction), | copper foam<br>(after<br>one<br>reaction), |
|----|------------------------|----------------|--------------------------------------------|--------------------------------------------|
| O  | (atomic<br>percentage) | 2.37           | 1.52                                       | 1.46                                       |
| Cu | (atomic<br>percentage) | 97.83          | 98.48                                      | 98.54                                      |

## 2. Characterization data for products

Most of adducts are literature-known [43-46] and obtained characterization data for these compounds is in full agreement with reported data.

### 2a 3-(4-methoxyphenyl)-1-phenyl-3-(4,4,5,5-tetramethyl-1,3,2-dioxaborolan-2-yl)propan-1-one

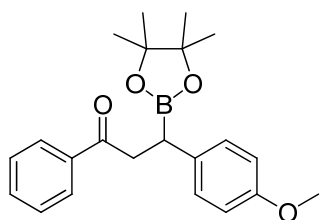

$^1\text{H}$  NMR (400 MHz,  $\text{CDCl}_3$ , ppm)  $\delta$  = 7.97-7.95 (m, 2H), 7.55-7.50 (m, 1H), 7.44-7.40 (m, 2H), 7.25-7.22 (m, 2H), 6.87-6.83 (m, 2H), 3.77 (s, 3H), 3.56-3.48 (dd,  $J$  = 18.2 Hz, 10.8 Hz, 1H), 3.42-3.37 (dd,  $J$  = 18.2 Hz, 5.2 Hz, 1H), 3.77-3.73 (dd,  $J$  = 10.8 Hz, 5.2 Hz, 1H), 1.26 (s, 6H), 1.18 (s, 6H).

$^{13}\text{C}$  NMR (100 MHz,  $\text{CDCl}_3$ , ppm)  $\delta$  = 199.61, 157.45, 136.56, 133.62, 132.78, 129.13, 128.33, 127.86, 113.80, 83.15, 55.00, 43.43, 24.44, 24.40.

### 3aa 3-Hydroxy-3-(4-methoxyphenyl)-1-phenylpropan-1-one

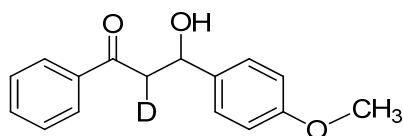

$^1\text{H}$  NMR (400 MHz,  $\text{CDCl}_3$ , ppm)  $\delta$  = 7.97-7.94 (m, 2H), 7.61-7.57 (m, 1H), 7.49-7.45 (m, 2H), 7.38-7.35 (m, 2H), 6.93-6.89 (m, 2H), 5.30-5.28 (d,  $J$  = 9.4 Hz, 1H), 3.81 (s, 3H), 3.59 (s, 1H), 3.37-3.32 (s, 2H).

$^{13}\text{C}$  NMR (100 MHz,  $\text{CDCl}_3$ , ppm)  $\delta$  = 200.30, 200.24, 159.05, 136.52, 136.51, 135.04, 133.60, 128.66, 128.11, 126.99, 113.88, 77.32, 77.00, 76.68, 69.62, 55.27, 47.29, 47.13, 46.94, 46.75.

**3a** 3-Hydroxy-3-(4-methoxyphenyl)-1-phenylpropan-1-one

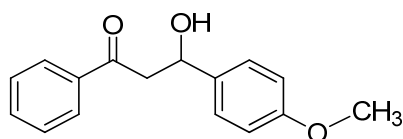

$^1\text{H}$  NMR (400 MHz,  $\text{CDCl}_3$ , ppm)  $\delta$  = 7.97-7.94 (m, 2H), 7.61-7.56 (tt,  $J$  = 7.4 Hz, 1.4Hz, 1H), 7.49-7.45 (m, 2H), 7.38-7.35 (m, 2H), 6.93-6.90 (m, 2H), 5.32-5.28 (m, 1H), 3.81 (s, 3H), 3.53-3.52 (d,  $J$  = 3.0 Hz, 1H), 3.37-3.35 (m, 2H).

$^{13}\text{C}$  NMR (100 MHz,  $\text{CDCl}_3$ , ppm)  $\delta$  = 200.01, 158.97, 136.53, 135.14, 133.44, 128.55, 128.04, 126.93, 113.80, 69.56, 55.17, 47.25.

**3b.** 3-Hydroxy-1-phenyl-3-(*p*-tolyl)propan-1-one

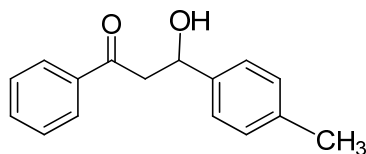

$^1\text{H}$  NMR (400 MHz,  $\text{CDCl}_3$ , ppm)  $\delta$  = 7.97-7.94 (m, 2H), 7.61-7.57 (tt,  $J$  = 7.4 Hz, 1.4Hz, 1H), 7.49-7.44 (m, 2H), 7.35-7.33 (d,  $J$  = 8.0 Hz, 2H), 7.20-7.18 (d,  $J$  = 7.8 Hz, 2H), 5.34-5.30 (m, 1H), 3.54 (d,  $J$  = 2.7 Hz, 1H), 3.38-3.32 (m, 2H), 2.36 (s, 3H).

$^{13}\text{C}$  NMR (100 MHz,  $\text{CDCl}_3$ , ppm)  $\delta$  = 200.09, 140.00, 137.25, 136.56, 133.51, 129.15, 128.61, 128.09, 125.64, 69.83, 47.34, 21.06.

**3c** 3-Hydroxy-1-phenyl-3-(4-(trifluoromethyl)phenyl)propan-1-one

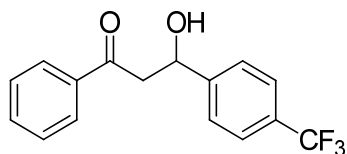

$^1\text{H}$  NMR (400 MHz,  $\text{CDCl}_3$ , ppm)  $\delta$  = 7.96-7.94(m, 2H), 7.65-7.56(m, 5H), 7.50-7.46(t,  $J$  = 8.0 Hz, 2H), 5.43-5.40(q,  $J$  = 4.0 Hz, 1H), 3.79(s, 1H), 3.39-3.35 (m, 2H).

$^{13}\text{C}$  NMR (100 MHz,  $\text{CDCl}_3$ , ppm)  $\delta$  = 199.78, 146.87, 136.31, 133.87, 130.02-130.01(d,  $J$  = 1.6 Hz), 129.72-129.681(d,  $J$  = 3.6 Hz), 128.75, 128.11, 126.02, 125.56-125.45(dd,  $J$  = 7.4 Hz, 3.4 Hz), 69.46, 47.17.

**3d** 3-(4-fluorophenyl)-3-hydroxy-1-phenylpropan-1-one

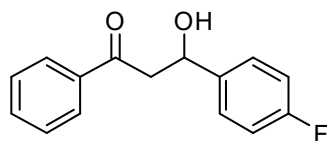

$^1\text{H}$  NMR (400 MHz,  $\text{CDCl}_3$ , ppm)  $\delta$  = 7.97-7.94 (m, 2H) 7.62-7.58 (m, 1H), 7.49-7.45(t,  $J$  = 7.8 Hz, 2H), 7.43-7.40(m, 2H), 7.09- 7.04(m, 2H), 5.35-5.31(m, 1H), 3.62-3.61 (d,  $J$  = 2.8 Hz, 1H), 3.36-3.34(m, 2H).

$^{13}\text{C}$  NMR (100 MHz,  $\text{CDCl}_3$ , ppm)  $\delta$  = 200.00, 163.42, 160.98, 138.72-138.69 (d,  $J$  = 20.8 Hz), 136.46, 133.70, 128.70, 128.12, 127.46- 127.38(d,  $J$  = 80.4Hz), 115.45-115.24(d,  $J$  = 212.0Hz), 69.43, 47.32.

**3e** 3-(4-chlorophenyl)-3-hydroxy-1-phenylpropan-1-one

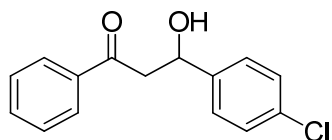

$^1\text{H}$  NMR (400 MHz,  $\text{CDCl}_3$ , ppm)  $\delta$  = 7.96-7.94 (m, 2H), 7.62-7.58(m, 1H), 7.49-7.46 (t,  $J$  = 8.0Hz, 2H), 7.39-7.34(m, 4H), 5.33 (dt,  $J$  = 11.2, 3.6Hz, 1H), 3.64 (dd,  $J$  = 5.4 Hz, 3.0 Hz, 1H), 3.40-3.25 (m, 2H).

$^{13}\text{C}$  NMR (100 MHz,  $\text{CDCl}_3$ , ppm)  $\delta$  = 199.84, 141.44, 136.36, 133.72, 133.25, 128.69, 128.62, 128.09, 127.12, 69.34, 47.19.

**3f** 3-(3-bromophenyl)-3-hydroxy-1-phenylpropan-1-one

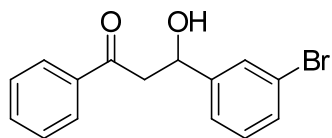

$^1\text{H}$  NMR (400 MHz,  $\text{CDCl}_3$ , ppm)  $\delta$  = 7.96-7.93(m, 2H), 7.62-7.58 (m, 2H), 7.49-7.45 (t,  $J$  = 7.8Hz, 2H), 7.43-7.41(dd,  $J$  = 8.0 Hz, 1.2 Hz, 1H), 7.36-7.34(d,  $J$  = 8.0 Hz, 1H), 7.26-7.22 (t,  $J$  = 7.8Hz, 1H), 5.33-5.29(m, 1H), 3.75(s, 1H), 3.35-3.33(m, 2H).

$^{13}\text{C}$  NMR (100 MHz,  $\text{CDCl}_3$ , ppm)  $\delta$  = 99.81, 145.21, 136.28, 133.77, 130.65, 130.09, 128.86, 128.71, 128.11, 124.34, 122.65, 69.29, 47.19.

**3g** 3-(4-(benzyloxy)phenyl)-3-hydroxy-1-phenylpropan-1-one

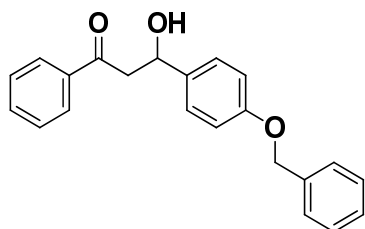

$^1\text{H}$  NMR (400 MHz,  $\text{CDCl}_3$ , ppm)  $\delta$  = 7.97-7.95(m, 2H), 7.61-7.57(m, 1H), 7.49-7.31(m, 9H), 7.01-6.97 (m, 2H), 5.32- 5.29(dd,  $J$  = 7.4 Hz, 4.8 Hz, 1H), 5.08(s, 2H), 3.54(s, 1H), 3.38-3.36(m, 2H),.

$^{13}\text{C}$  NMR (100 MHz,  $\text{CDCl}_3$ , ppm)  $\delta$  = 200.24, 158.31, 136.95, 136.57, 135.37, 133.60, 128.68, 128.56, 128.13, 127.93, 127.42, 127.03, 114.90, 70.03, 69.67, 47.30.

**3h** 3-Hydroxy-1,3-diphenylpropan-1-one

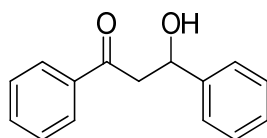

$^1\text{H}$  NMR (400 MHz,  $\text{CDCl}_3$ , ppm)  $\delta$  = 7.97-7.95 (m, 2H), 7.61-7.57 (tt,  $J$  = 7.2Hz, 1.2 Hz, 1H), 7.49-7.44 (m, 4H), 7.40-7.37 (t,  $J$  = 7.4 Hz, 2H), 7.32-7.29 (m, 1H), 5.37-5.34 (t,  $J$  = 2.2 Hz, 1H), 3.61 (s, 1H), 3.39-3.31 (m, 2H).

$^{13}\text{C}$  NMR (100 MHz,  $\text{CDCl}_3$ , ppm)  $\delta$  = 199.88, 142.96, 136.47, 133.44, 128.53, 128.39, 128.03, 127.49, 125.64, 69.87, 47.29.nn

**3i** 3-hydroxy-1-(4-methoxyphenyl)-3-phenylpropan-1-one

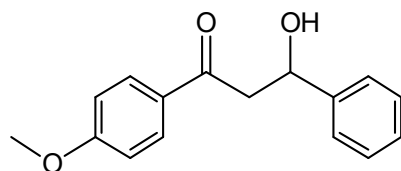

$^1\text{H}$  NMR (400 MHz,  $\text{CDCl}_3$ , ppm)  $\delta$  = 7.95-7.92 (m, 2H), 7.46-7.43 (m, 2H), 7.40-7.36 (m, 2H), 7.32-7.28(tt,  $J$  = 6.4 Hz, 1.4 Hz, 1H), 6.95- 6.92 (m, 2H), 5.34- 5.31 (m, 1H), 3.87(s, 3H), 3.77(s, 1H), 3.33- 3.30(m, 2H).

$^{13}\text{C}$  NMR (100 MHz,  $\text{CDCl}_3$ , ppm)  $\delta$  = 198.73, 163.92, 143.04, 130.47, 129.63, 128.51, 127.57, 125.73, 113.83, 70.14, 55.49, 46.90.

**3j** 3-Hydroxy-3-phenyl-1-(*p*-tolyl)propan-1-one

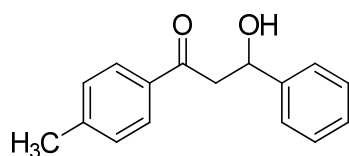

$^1\text{H}$  NMR (400 MHz,  $\text{CDCl}_3$ , ppm)  $\delta$  = 7.87-7.85 (m, 2H), 7.46 – 7.43(m, 2H), 7.40-7.36 (m, 2H), 7.32-7.30 (m, 1H), 7.27-7.25 (d,  $J$  = 7.6 Hz, 4H), 5.34 (m, 1H), 3.66-3.65 (d,  $J$  = 2.8 Hz, 1H), 3.35-3.34 (m, 2H), 2.42 (s, 3H).

$^{13}\text{C}$  NMR (100 MHz,  $\text{CDCl}_3$ , ppm)  $\delta$  = 199.82, 144.55, 142.98, 134.08, 129.34, 128.50, 128.24, 127.58, 125.72, 70.05, 47.18, 21.66.

**3k** 1-(4-fluorophenyl)-3-hydroxy-3-phenylpropan-1-one

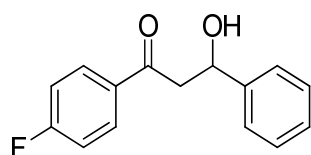

$^1\text{H}$  NMR (400 MHz,  $\text{CDCl}_3$ , ppm)  $\delta$  = 8.01-7.96 (m, 2H), 7.45-7.43 (m, 2H), 7.41-7.35 (m, 2H), 7.33-7.29 (m, 1H), 7.17-7.11 (m, 2H), 5.37-5.33 (qui,  $J$  = 3.6 Hz, 1H), 3.48-3.48 (d,  $J$  = 3.0 Hz, 1H), 3.36-3.34(m, 2H).

$^{13}\text{C}$  NMR (100 MHz,  $\text{CDCl}_3$ , ppm)  $\delta$  = 198.40, 167.29-164.75(d,  $J$  = 254.2Hz), 142.83, 133.04-133.01(d,  $J$  = 2.0 Hz), 130.88-130.78(d,  $J$  = 9.4 Hz), 128.57, 127.71, 125.69, 115.93-115.71(d,  $J$  = 21.8 Hz), 69.99, 47.33.

**3l** 3-Hydroxy-1,3-bis(4-methoxyphenyl)propan-1-one



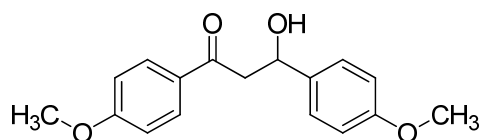

$^1\text{H}$  NMR (400 MHz,  $\text{CDCl}_3$ , ppm)  $\delta$  = 7.94-7.90 (m, 2H), 7.37-7.34 (m, 2H), 6.94-6.88 (m, 4H), 5.28-5.25 (td,  $J$  = 6.2 Hz, 2.4 Hz, 1H), 3.86 (s, 3H), 3.80 (s, 3H), 3.72 (d,  $J$  = 2.4 Hz, 1H), 3.30-3.29 (d,  $J$  = 6.0 Hz, 2H).

$^{13}\text{C}$  NMR (100 MHz,  $\text{CDCl}_3$ , ppm)  $\delta$  = 198.73, 163.84, 159.00, 135.25, 130.43, 129.66, 126.97, 113.84, 113.77, 69.75, 55.44, 55.23, 46.82.

**3m** 3-(4-bromophenyl)-3-hydroxy-1-(4-methoxyphenyl)propan-1-one

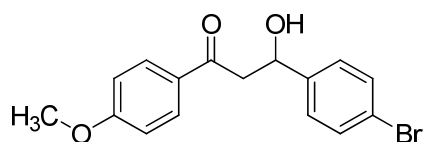

$^1\text{H}$  NMR (400 MHz,  $\text{CDCl}_3$ , ppm)  $\delta$  = 7.94-7.91 (m, 2H), 7.52-7.48 (m, 2H), 7.33-7.31 (m, 2H), 6.95-6.92 (m, 2H), 5.30 – 5.26 (m, 1H), 3.88 (s, 3H), 3.81-3.80 (d,  $J$  = 2.6 Hz, 1H), 3.30-3.25 (m, 2H).

$^{13}\text{C}$  NMR (100 MHz,  $\text{CDCl}_3$ , ppm)  $\delta$  = 198.36, 163.97, 142.10, 131.51, 130.44, 129.42, 127.46, 121.25, 113.83, 69.50, 55.47, 46.64.

**3n** 3-(2-chlorophenyl)-3-hydroxy-1-(4-methoxyphenyl)propan-1-one

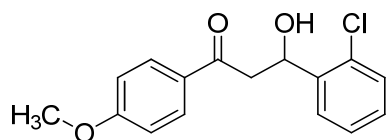

$^1\text{H}$  NMR (400 MHz,  $\text{CDCl}_3$ , ppm)  $\delta$  = 7.95-7.92 (m, 2H), 7.73-7.71 (dd,  $J$  = 7.8 Hz, 1.8 Hz, 1H), 7.35-7.31 (t,  $J$  = 8.8 Hz, 2H), 7.25-7.20 (td,  $J$  = 7.6 Hz, 1.8 Hz, 1H),

6.94-6.91 (m, 2H), 5.67-5.64 (dt,  $J = 9.6$  Hz,  $2.4$  Hz, 1H), 4.06 (s, 1H), 3.86 (s, 3H), 3.54-3.49 (m, 1H), 3.07 (dd,  $J = 17.4$  Hz,  $9.6$  Hz, 1H).

$^{13}\text{C}$  NMR (100 MHz,  $\text{CDCl}_3$ , ppm)  $\delta = 198.80, 163.94, 140.42, 131.09, 130.50, 129.43, 129.23, 128.45, 127.24, 127.19, 113.80, 66.91, 55.47, 44.77$ .

**3o** 3-(4-fluorophenyl)-3-hydroxy-1-(p-tolyl)propan-1-one

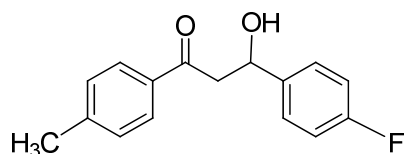

$^1\text{H}$  NMR (400 MHz,  $\text{CDCl}_3$ , ppm)  $\delta = 7.86$ - $7.84$  (m, 2H),  $7.43$ - $7.39$  (m, 2H),  $7.27$ - $7.25$  (d,  $J = 8.0$  Hz, 3H),  $7.09$ - $7.03$  (m, 2H),  $5.33$ - $5.29$  (m, 1H),  $3.71$ - $3.71$  (d,  $J = 2.8$  Hz, 1H),  $3.33$ - $3.30$  (m, 2H),  $2.42$  (s, 3H).

$^{13}\text{C}$  NMR (100 MHz,  $\text{CDCl}_3$ , ppm)  $\delta = 199.59, 163.32$ - $160.88$  (d,  $J = 244.0$  Hz),  $144.61, 138.80$ - $138.77$  (d,  $J = 244.0$  Hz),  $133.96, 129.32, 128.20, 127.42$ - $127.34$  (d,  $J = 8.0$  Hz),  $115.34$ - $115.13$  (d,  $J = 21.2$  Hz),  $69.42, 47.09, 21.60$ .

**3p** 3-(4-chlorophenyl)-1-(4-fluorophenyl)-3-hydroxypropan-1-one

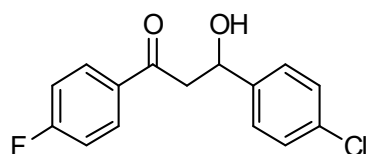

$^1\text{H}$  NMR (400 MHz,  $\text{CDCl}_3$ , ppm)  $\delta = 7.99$ - $7.96$  (dd,  $J = 8.4$  Hz,  $5.4$  Hz, 2H),  $7.38$ - $7.33$  (m, 4H),  $7.16$ - $7.12$  (t,  $J = 8.4$  Hz, 2H),  $5.33$ - $5.30$  (m, 1H),  $3.60$  (s, 1H),  $3.31$ - $3.30$  (m, 2H).

$^{13}\text{C}$  NMR (100 MHz,  $\text{CDCl}_3$ , ppm)  $\delta$  = 198.21, 167.37-164.82(d,  $J$  = 254.6 Hz), 141.29, 133.37, 132.85-132.82 (d,  $J$  = 3.0 Hz), 130.88-130.79(d,  $J$  = 9.4 Hz), 128.70, 127.11, 116.01-115.80 (d,  $J$  = 21.8 Hz), 69.34, 47.17.

**3q** 3-Hydroxy-3-(naphthalen-1-yl)-1-phenylpropan-1-one

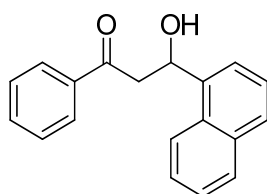

$^1\text{H}$  NMR (400 MHz,  $\text{CDCl}_3$ , ppm)  $\delta$  = 8.07-8.04 (m, 1H), 7.98-7.95 (m, 2H), 7.91-7.89 (m, 1H), 7.83-7.80 (dd, 8.6 Hz, 5.0 Hz, 2H), 7.61-7.57 (m, 1H), 7.54-7.49(m, 3H), 7.48-7.44(m, 2H), 6.18-6.15(dt,  $J$  = 9.2 Hz, 2.6Hz, 1H), 3.75 (s, 1H), 3.60-3.54(dd,  $J$  = 18.0 Hz, 2.2 Hz, 1H), 3.52-3.45(q,  $J$  = 9.0 Hz, 1H)

$^{13}\text{C}$  NMR (100 MHz,  $\text{CDCl}_3$ , ppm)  $\delta$  = 200.31, 138.41, 136.47, 133.75, 133.68, 129.87, 129.03, 128.69, 128.17, 128.04, 126.22, 125.62, 125.54, 123.13, 122.76, 66.78, 46.77.

**3r** 4-hydroxy-4-(4-methoxyphenyl)butan-2-one

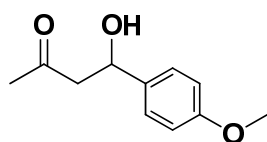

$^1\text{H}$  NMR (400 MHz,  $\text{CDCl}_3$ , ppm)  $\delta$  = 7.21- 7.19 (d, 8.4 Hz, 2H), 6.81- 6.79(d, 8.4 Hz, 2H), 5.03- 5.00 (dd, 9.2Hz, 2.8 Hz, 1H), 3.72(s, 3H), 3.20(s, 1H), 2.84-2.77(dd,  $J$  = 17.4Hz, 9.2 Hz, 1H), 2.72- 2.67 (m,1H), 2.11(s, 3H),.

$^{13}\text{C}$  NMR (100 MHz,  $\text{CDCl}_3$ , ppm)  $\delta$  = 209.12, 159.04, 134.87, 126.87, 113.84, 69.44, 55.23, 51.90, 30.73.

**3s** 4-(4-chlorophenyl)-4-hydroxybutan-2-one

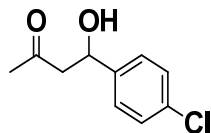

$^1\text{H}$  NMR (400 MHz,  $\text{CDCl}_3$ , ppm)  $\delta$  = 7.25-7.20(m,4H), 5.06-5.04(d, 8.6 Hz, 2H), 3.40-3.39(d, 3.2 Hz, 2H), 2.76-2.72(m,2H), 2.12(s,3H).

$^{13}\text{C}$  NMR (100 MHz,  $\text{CDCl}_3$ , ppm)  $\delta$  = 208.91, 141.15, 133.31, 128.64, 127.00, 69.14, 51.76, 30.74.

**3t** 4-Hydroxy-4-phenylbutan-2-one

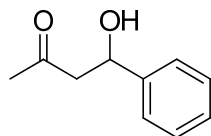

$^1\text{H}$  NMR (400 MHz,  $\text{CDCl}_3$ , ppm)  $\delta$  = 7.28-7.26 (d,  $J$  = 4.8 Hz, 4H), 7.21-7.18 (m, 1H), 5.08-5.05 (dd,  $J$  = 9.0 Hz, 3.4 Hz, 1H), 3.26 (s, 1H), 2.84-2.77 (dd,  $J$  = 17.4 Hz, 9.0 Hz, 1H), 2.75-2.69 (dd,  $J$  = 17.4 Hz, 3.4 Hz, 1H), 2.10 (s, 3H).

$^{13}\text{C}$  NMR (100 MHz,  $\text{CDCl}_3$ , ppm)  $\delta$  = 208.94, 142.74, 128.47, 127.60, 125.56, 69.80, 51.93, 30.69.

**3u** 1-Hydroxy-4,4-dimethyl-1-phenylpentan-3-one

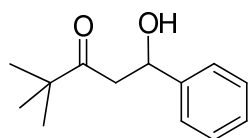

$^1\text{H}$  NMR (400 MHz,  $\text{CDCl}_3$ , ppm)  $\delta$  = 7.34-7.26(m, 4H), 7.25-7.22(m, 1H), 5.11-5.07(sext,  $J$  = 3.0 Hz, 1H), 3.55-3.54 (d,  $J$  = 3.0 Hz, 1H), 2.85- 2.84(d,  $J$  = 6.2Hz, 1H), 1.09(s, 9H).

$^{13}\text{C}$  NMR (100 MHz,  $\text{CDCl}_3$ , ppm)  $\delta$  = 216.71, 143.03, 128.41, 127.48, 125.60, 70.02, 45.43, 44.32, 26.08.

**3v** 3-hydroxy-3-phenylpropanenitrile

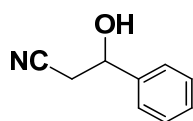

$^1\text{H}$  NMR (400 MHz,  $\text{CDCl}_3$ , ppm)  $\delta$  = 7.41-7.34(m, 5H), 5.06-5.03(sext,  $J$  = 3.2 Hz, 1H), 2.78-2.78(d,  $J$  = 1.6 Hz, 1H), .78-2.78(d,  $J$  = 0.8 Hz, 1H), 2.56-2.55(d,  $J$  = 3.6 Hz, 1H).

$^{13}\text{C}$  NMR (100 MHz,  $\text{CDCl}_3$ , ppm)  $\delta$  =140.96, 128.92, 128.84, 125.48, 117.25, 70.12, 27.92.

**3w** 3-Hydroxy-1,5-diphenylpent-4-en-1-one

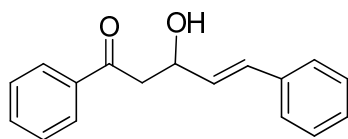

$^1\text{H}$  NMR (400 MHz,  $\text{CDCl}_3$ , ppm)  $\delta$  = 7.99-7.97 (m, 2H), 7.63-7.58 (m, 1H), 7.51-7.47 (m, 2H), 7.41-7.39 (m, 2H), 7.36 – 7.29 (m, 2H), 7.27-7.22 (m, 1H), 6.74-6.70 (dd,  $J$  = 16.0 Hz, 1.4 Hz, 1H), 6.35-6.30(dd,  $J$  = 16.0 Hz, 6.0 Hz, 1H), 4.98-4.95(m, 1H), 3.40 (s, 1H), 3.31-3.28 (m, 2H).

$^{13}\text{C}$  NMR (100 MHz,  $\text{CDCl}_3$ , ppm)  $\delta$  = 200.08, 136.59, 136.54, 133.66, 130.45, 130.21, 128.72, 128.56, 128.13, 127.71, 126.49, 77.32, 45.17, 29.69.

**3x** 3-hydroxy-1-phenyl-3-(thiophen-2-yl)propan-1-one

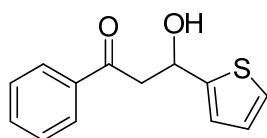

$^1\text{H}$  NMR (400 MHz,  $\text{CDCl}_3$ , ppm)  $\delta$  = 7.98-7.96 (m, 2H), 7.62-7.58 (m, 1H), 7.50-7.46 (t,  $J$  = 7.6 Hz, 2H), 7.28-7.27 (m, 1H), 7.05-7.03 (dd,  $J$  = 3.6 Hz, 1.2 Hz, 1H), 7.00-6.98 (m, 1H), 5.63-5.59 (quint,  $J$  = 3.8 Hz, 1H), 3.77-3.75 (m, 1H), 3.52-3.50 (m, 2H).

$^{13}\text{C}$  NMR (100 MHz,  $\text{CDCl}_3$ , ppm)  $\delta$  = 199.46, 146.66, 136.36, 133.65, 128.65, 128.09, 126.62, 124.59, 123.47, 66.35, 47.10.

**3y** 3-Hydroxy-3-(thiophen-2-yl)-1-(*m*-tolyl)propan-1-one

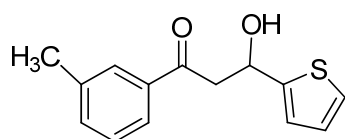

$^1\text{H}$  NMR (400 MHz, Chloroform- $d$ )  $\delta$  7.78-7.75 (m, 2H), 7.44-7.34 (m, 2H), 7.28-7.27 (dd,  $J$  = 5.0 Hz, 1.2 Hz, 1H), 7.04-7.03 (m, 1H), 7.00-6.98 (dd,  $J$  = 5.0 Hz, 3.4 Hz, 1H), 5.61-5.58 (t,  $J$  = 7.8 Hz, 1H), 3.81 (s, 1H), 3.50-3.49 (m, 2H), 2.42 (s, 3H).

$^{13}\text{C}$  NMR (100 MHz,  $\text{CDCl}_3$ , ppm)  $\delta$  = 199.88, 146.63, 138.57, 136.40, 134.54, 128.63, 128.60, 126.67, 125.38, 124.66, 123.50, 66.46, 47.16, 21.33.

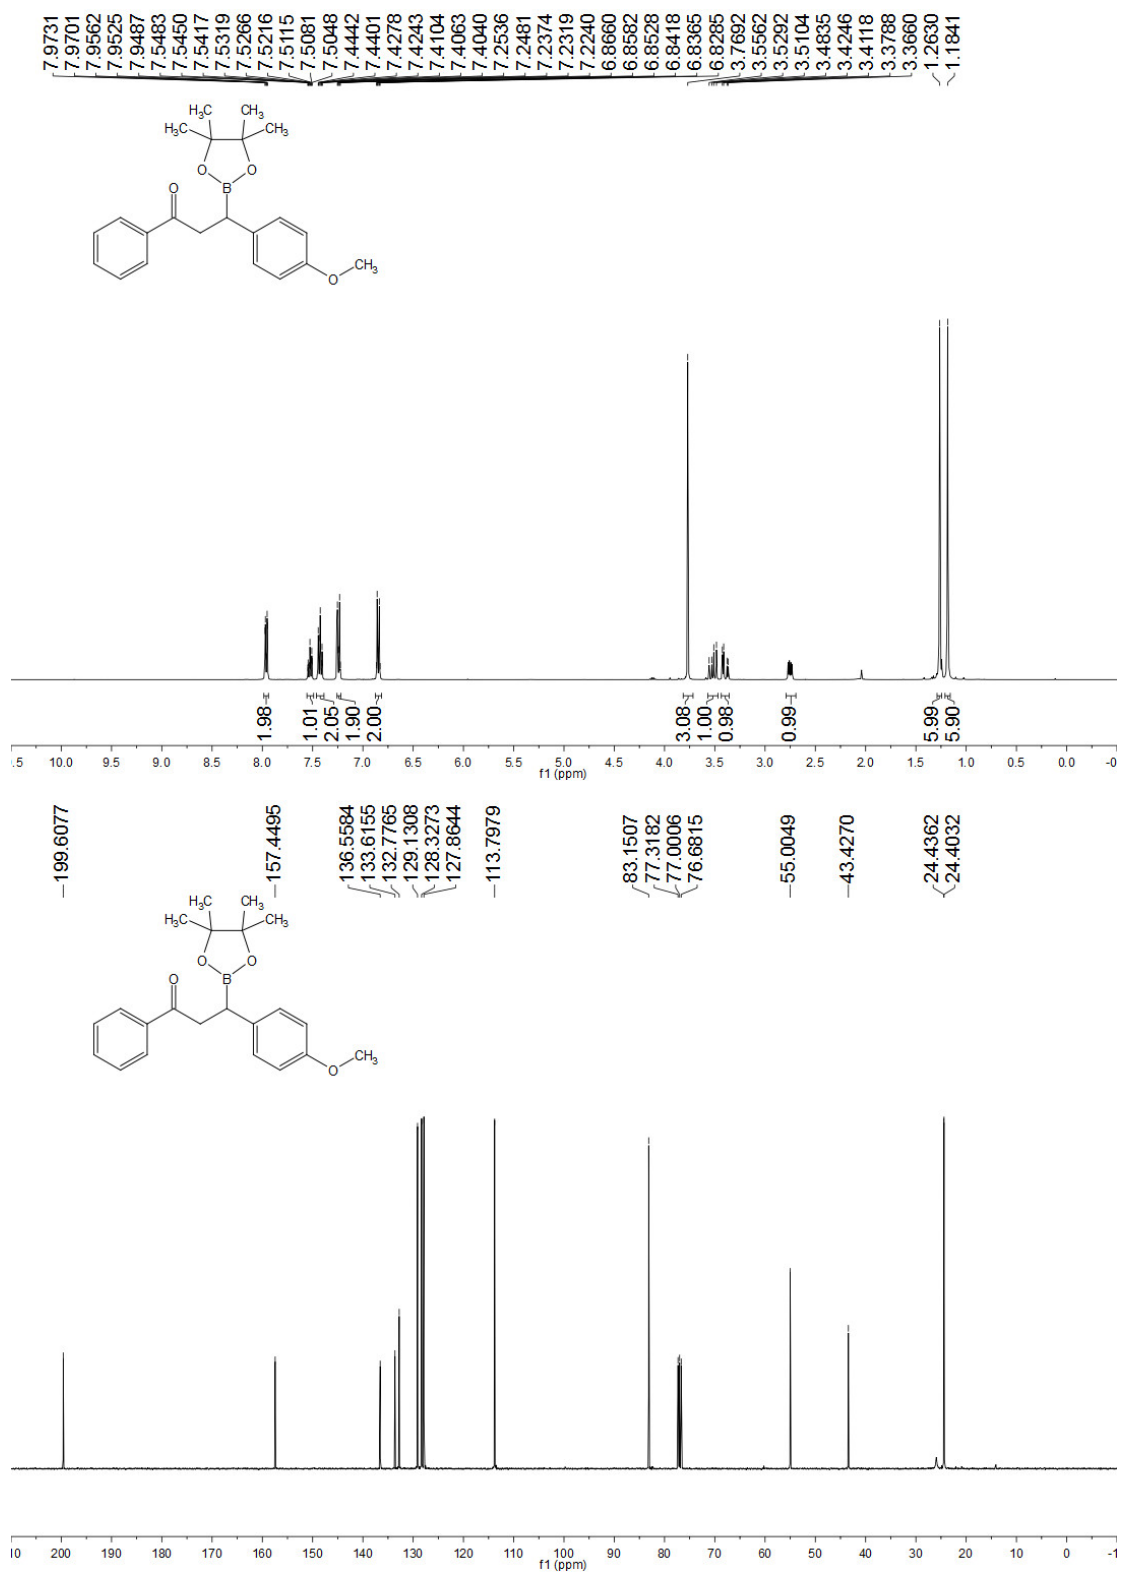

**Figure S1.** <sup>1</sup>H NMR and <sup>13</sup>C NMR spectra of 2a.

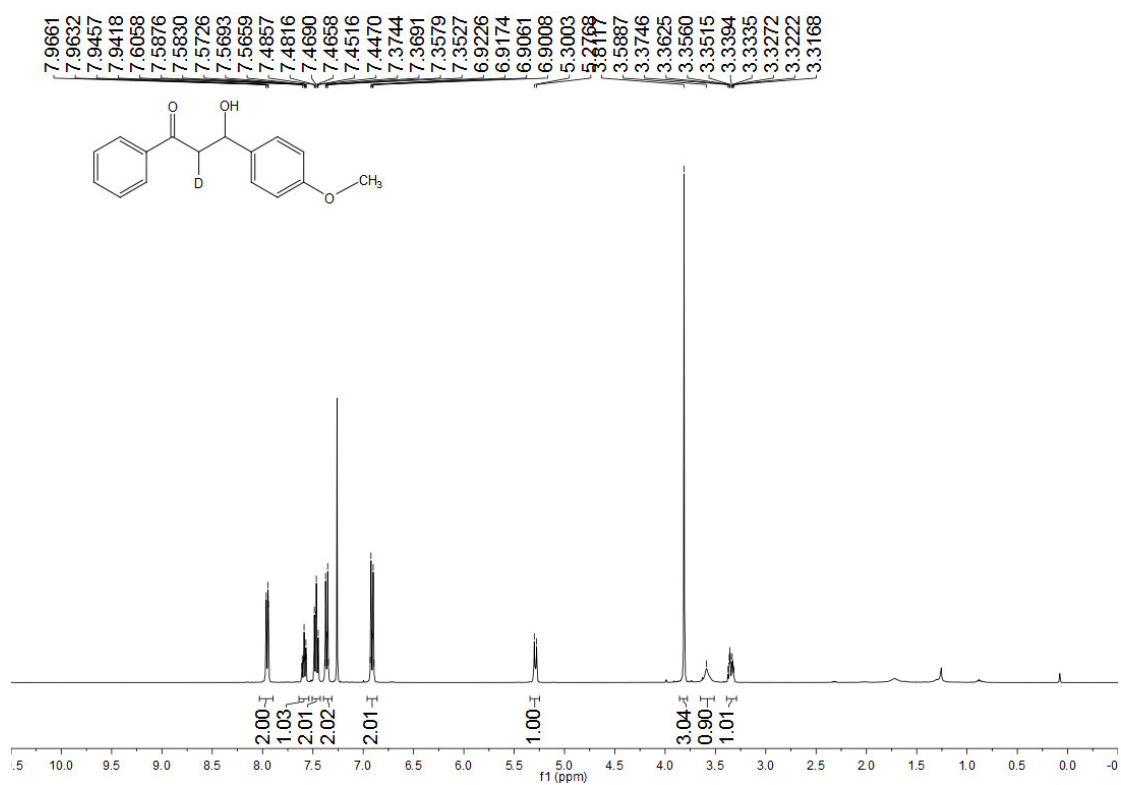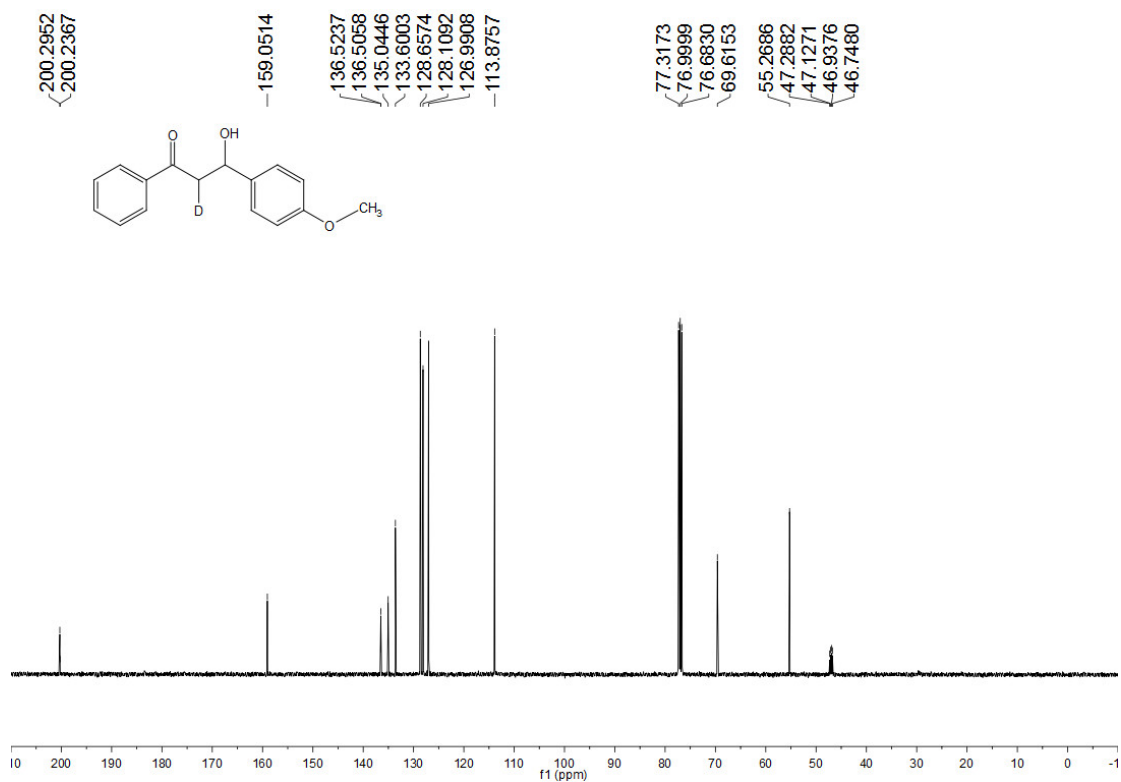

**Figure S2.** <sup>1</sup>H NMR and <sup>13</sup>C NMR spectra of **3aa**.



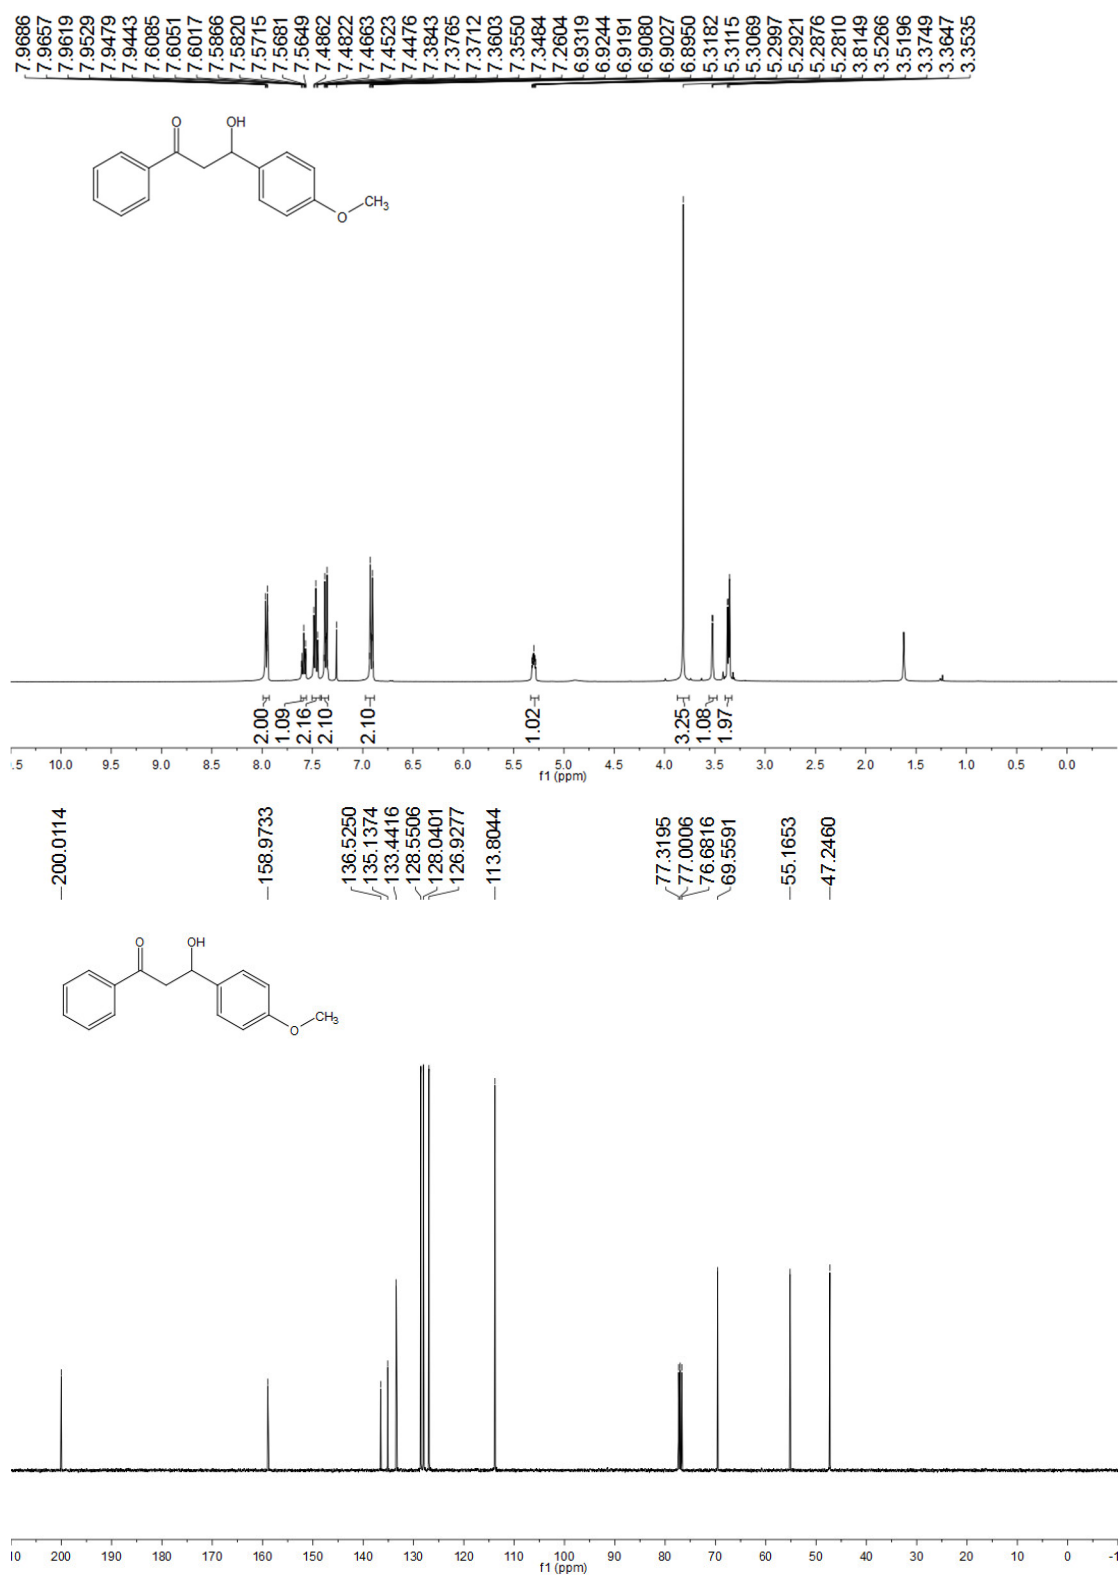

Figure S3. <sup>1</sup>H NMR and <sup>13</sup>C NMR spectra of 3a.

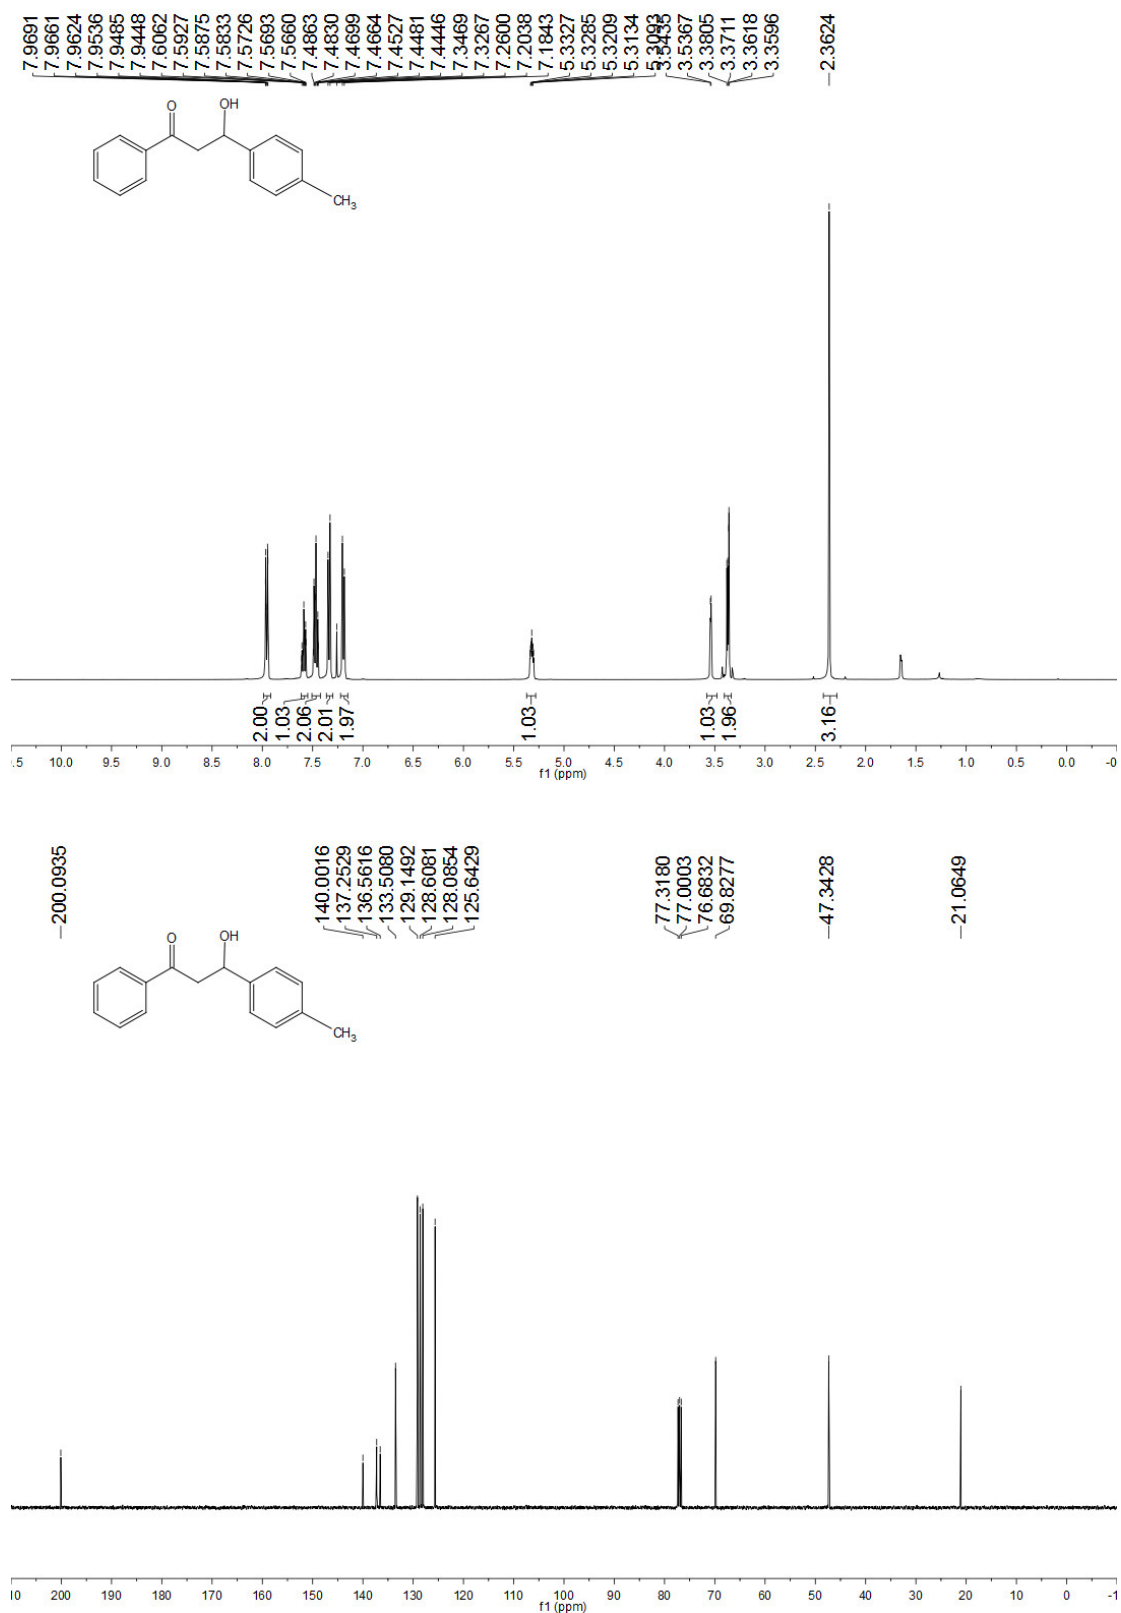

**Figure S4.** <sup>1</sup>H NMR and <sup>13</sup>C NMR spectra of **3b**.

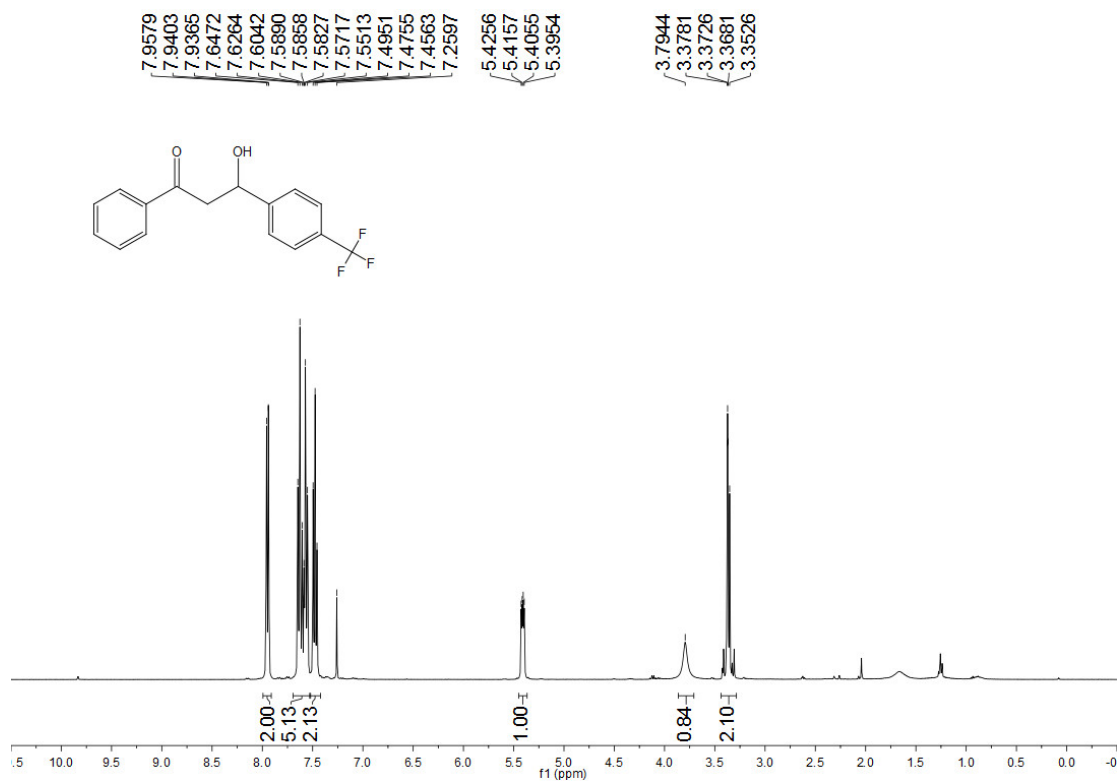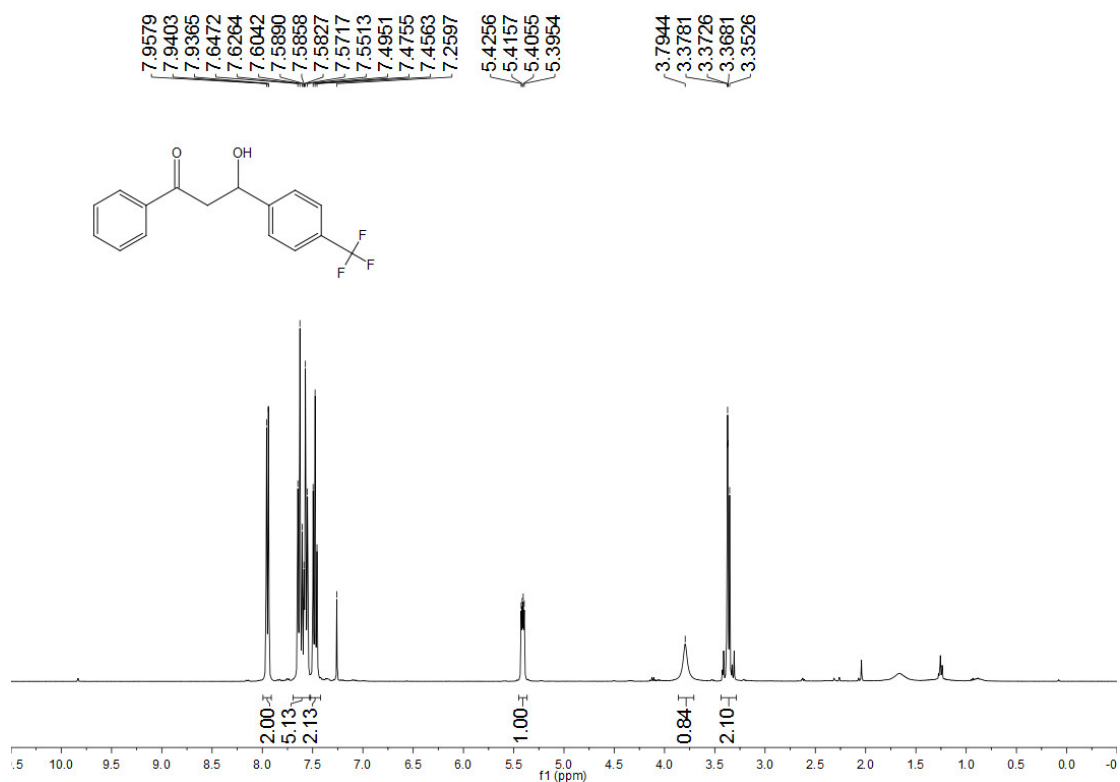

Figure S5. <sup>1</sup>H NMR and <sup>13</sup>C NMR spectra of 3c.

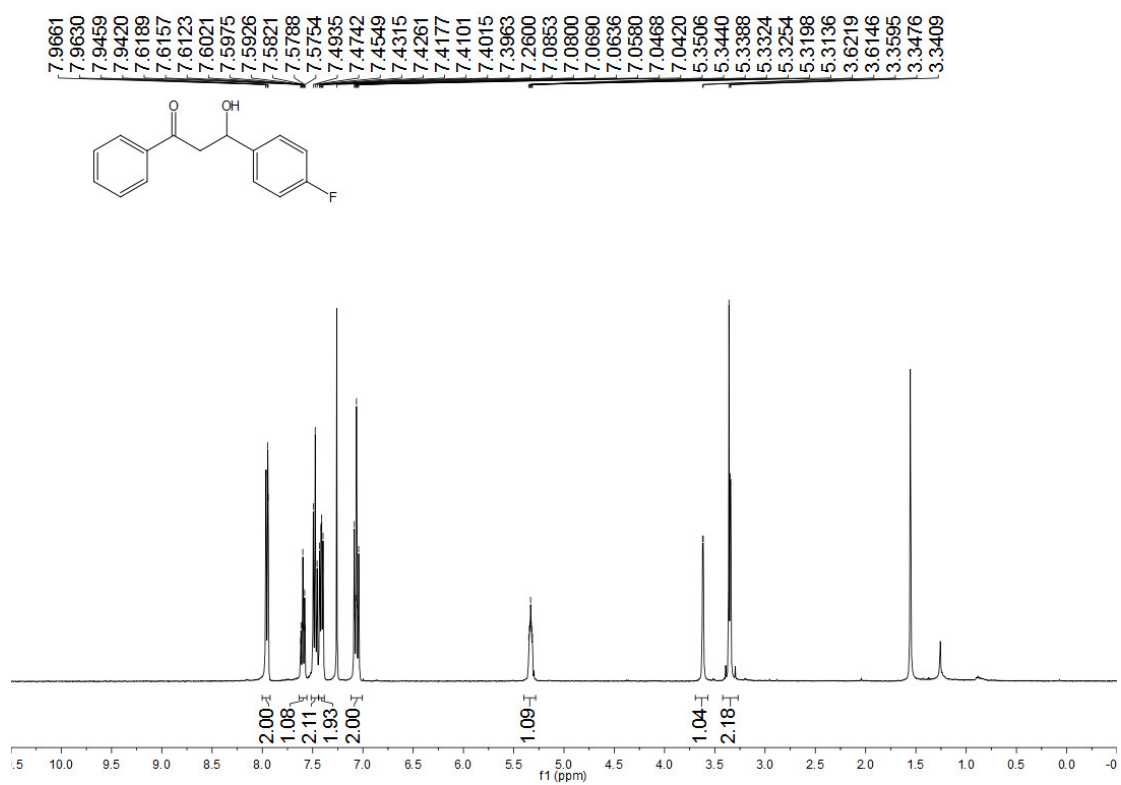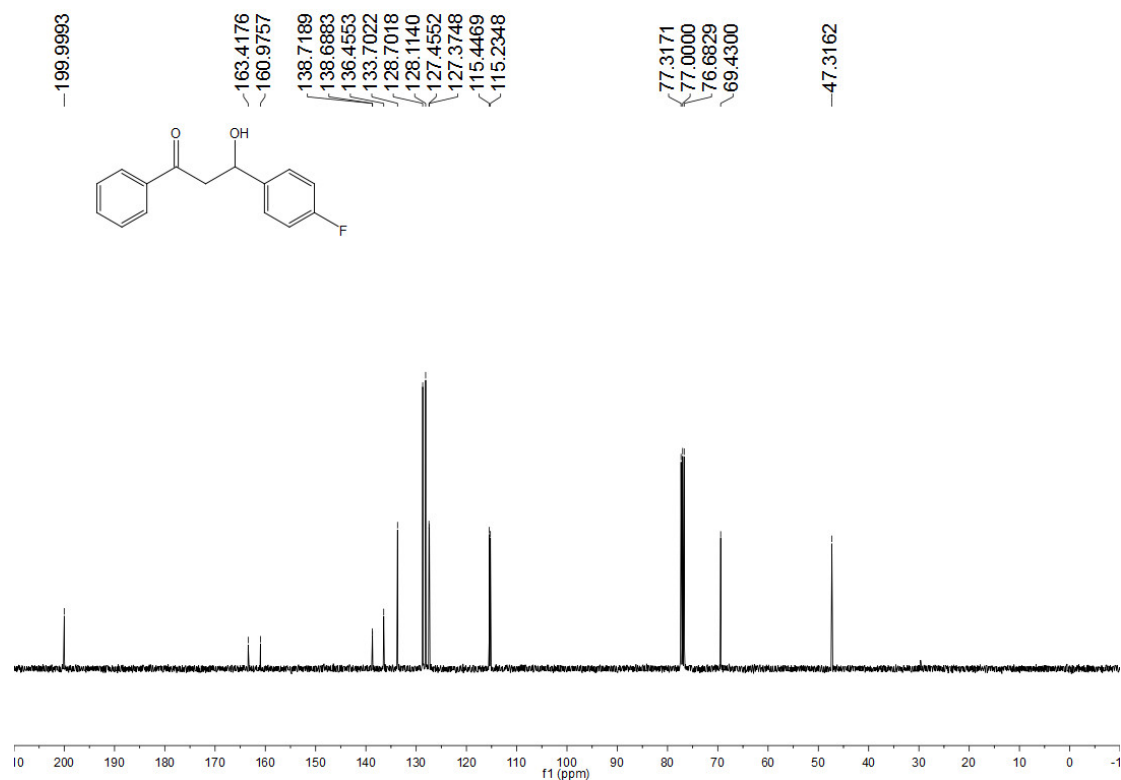

**Figure S6.** <sup>1</sup>H NMR and <sup>13</sup>C NMR spectra of **3d**.

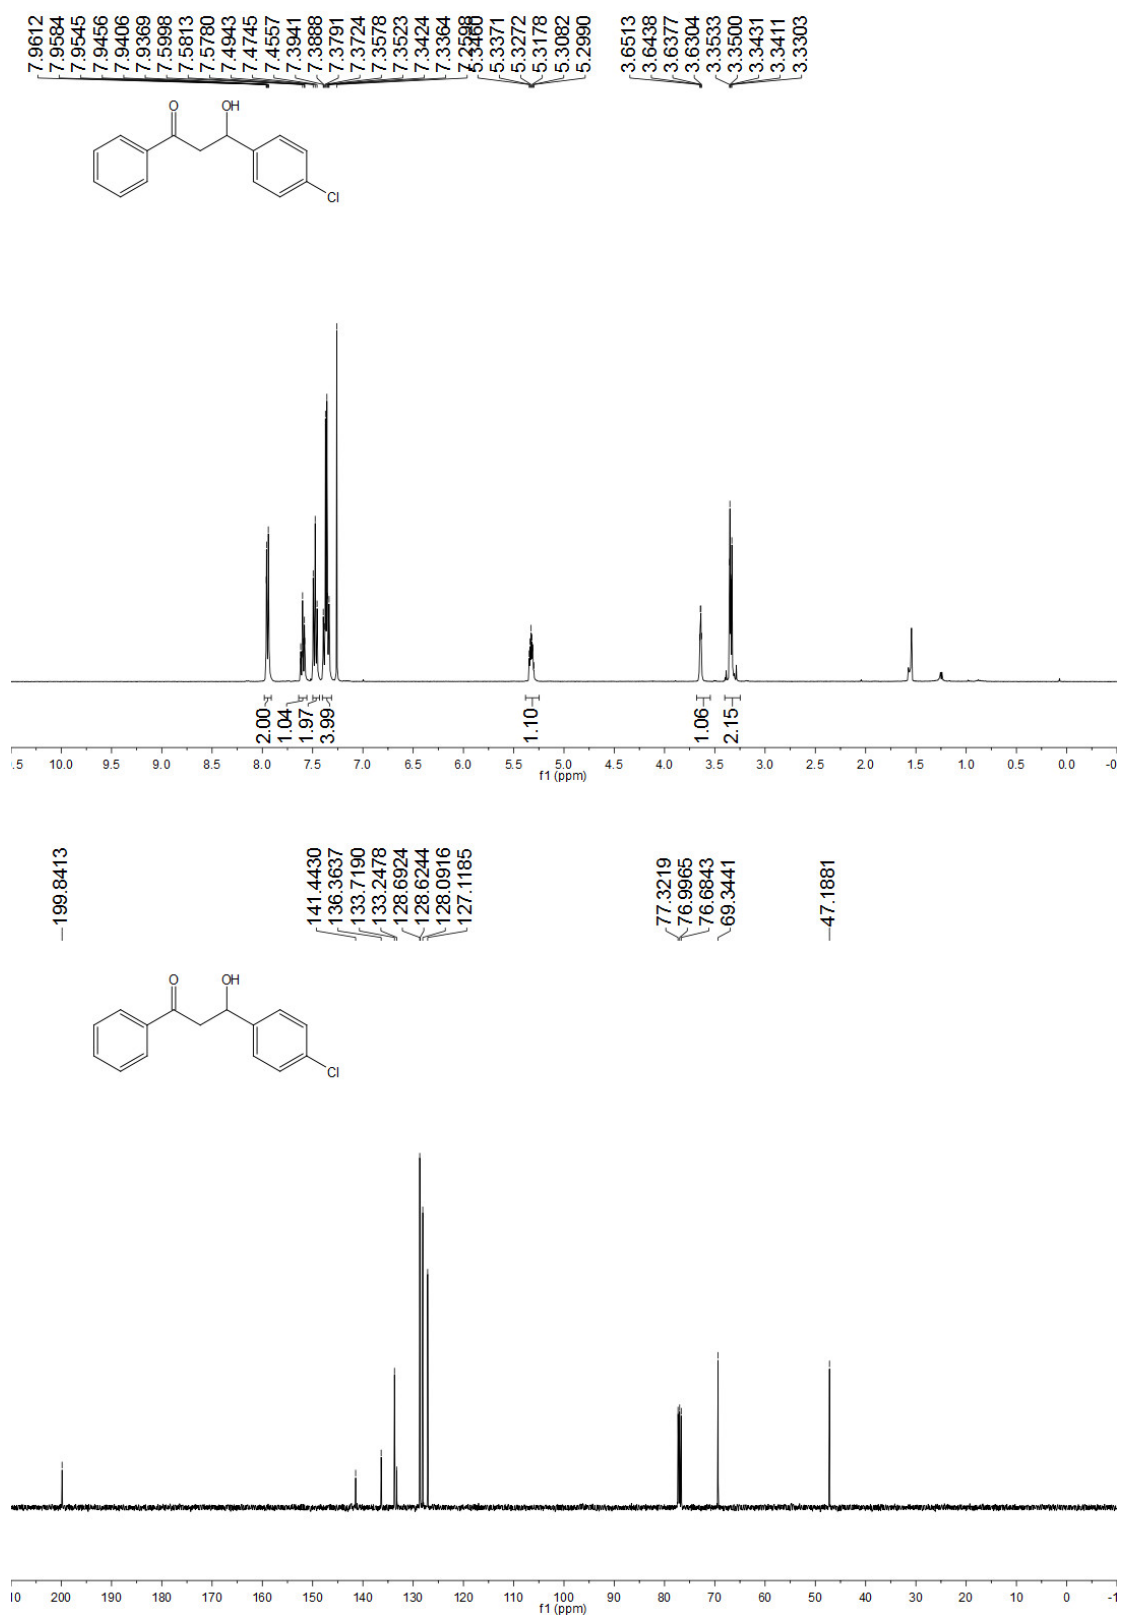

Figure S7. <sup>1</sup>H NMR and <sup>13</sup>C NMR spectra of 3e.

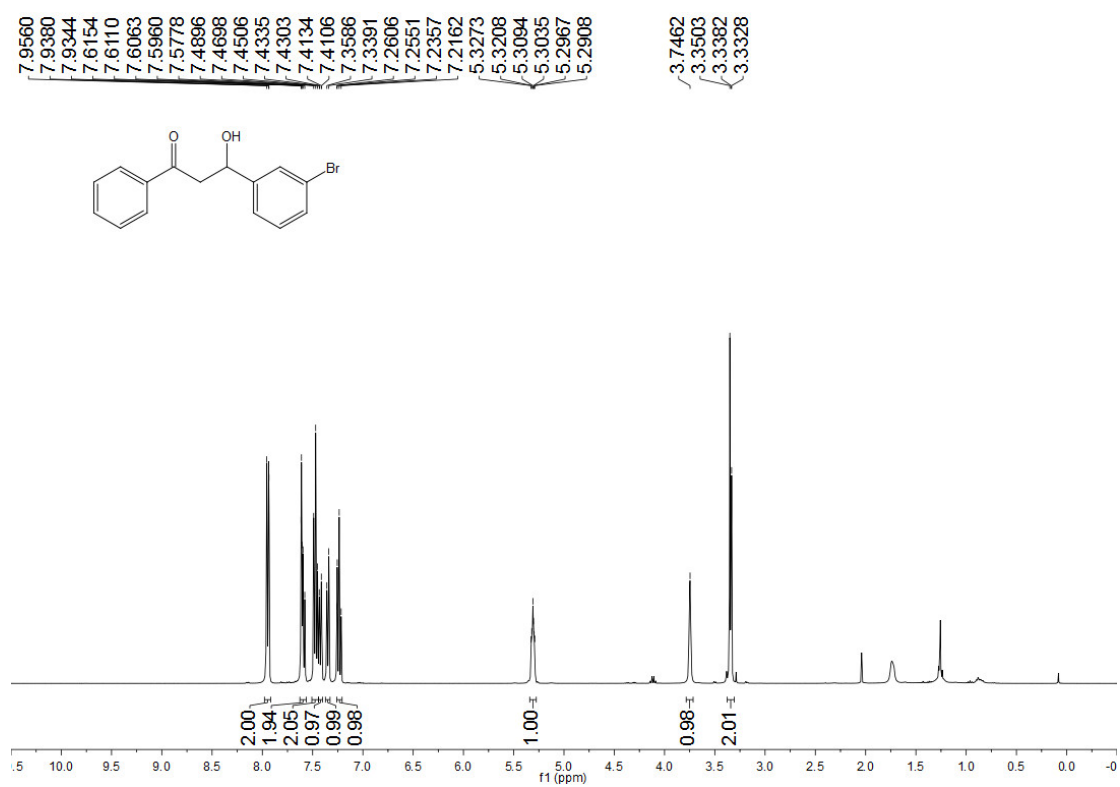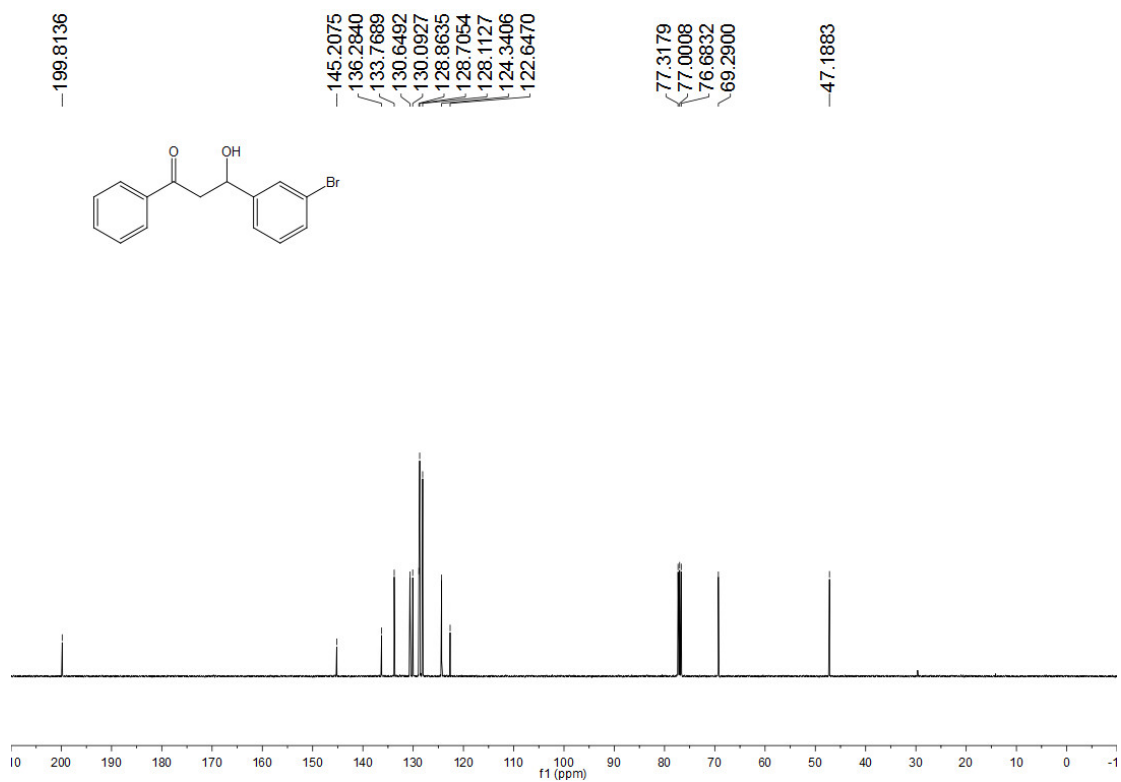

**Figure S8.** <sup>1</sup>H NMR and <sup>13</sup>C NMR spectra of 3f.

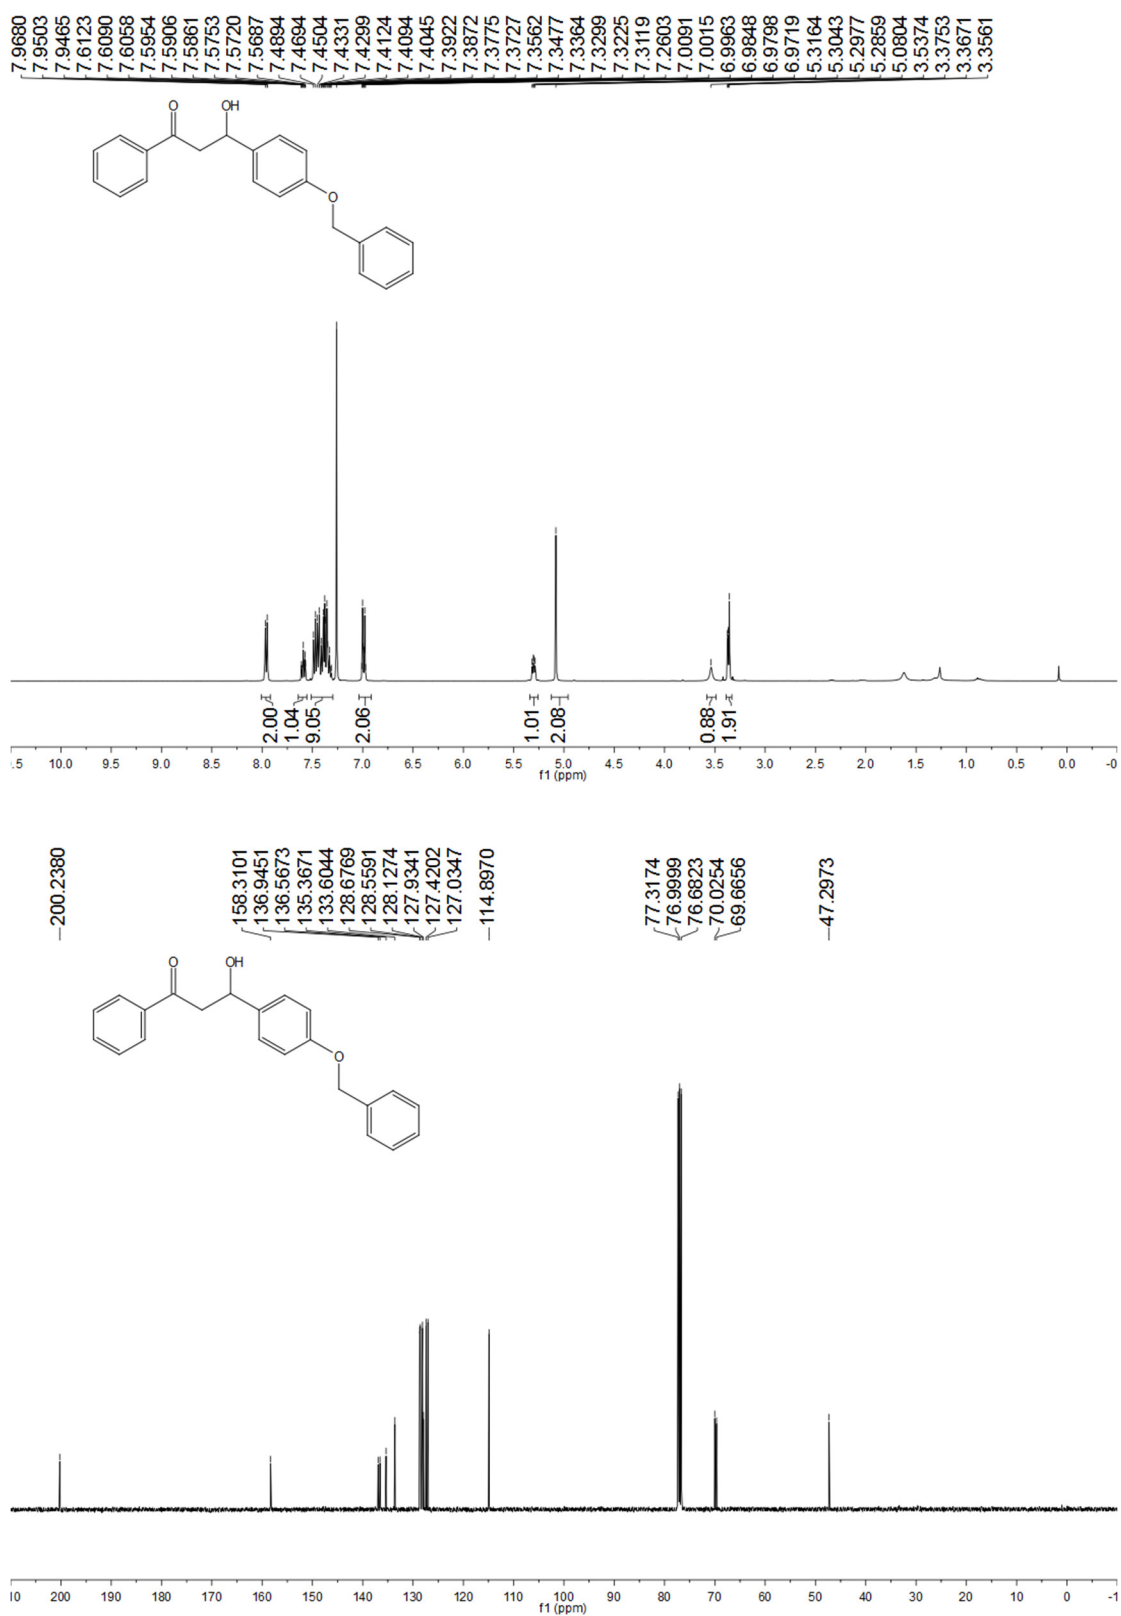

**Figure S9.** <sup>1</sup>H NMR and <sup>13</sup>C NMR spectra of **3g**.

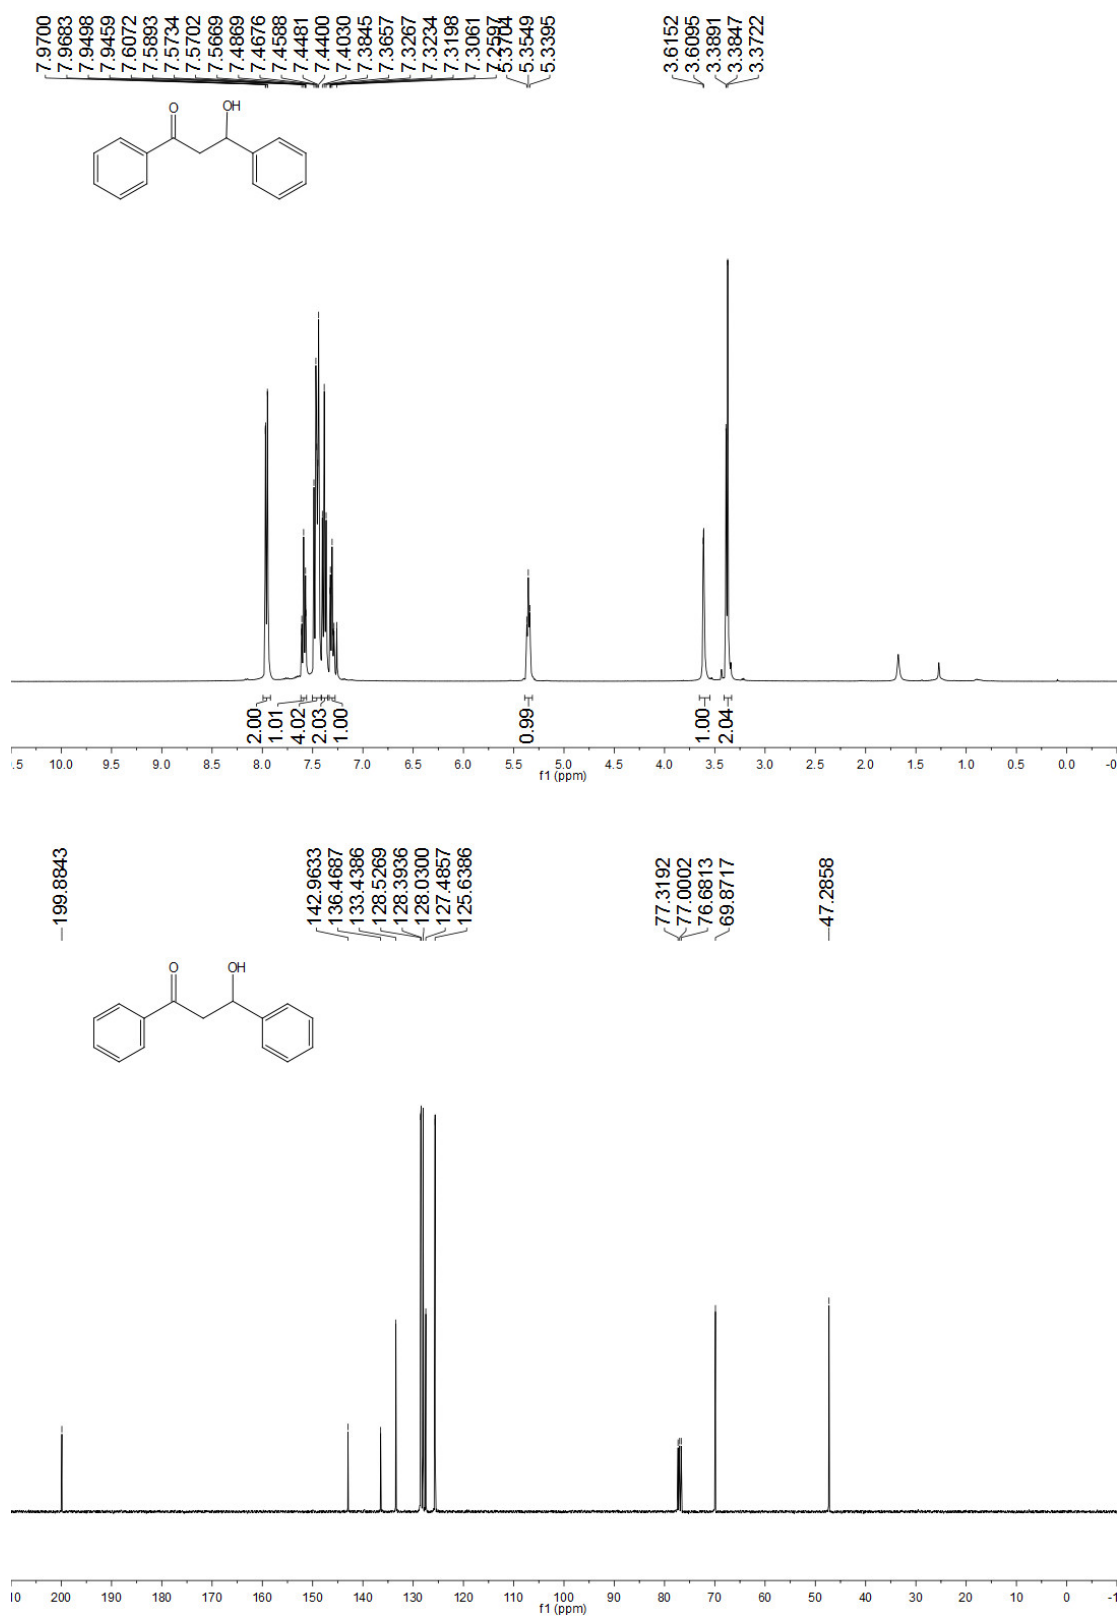

**Figure S10.** <sup>1</sup>H NMR and <sup>13</sup>C NMR spectra of 3h.



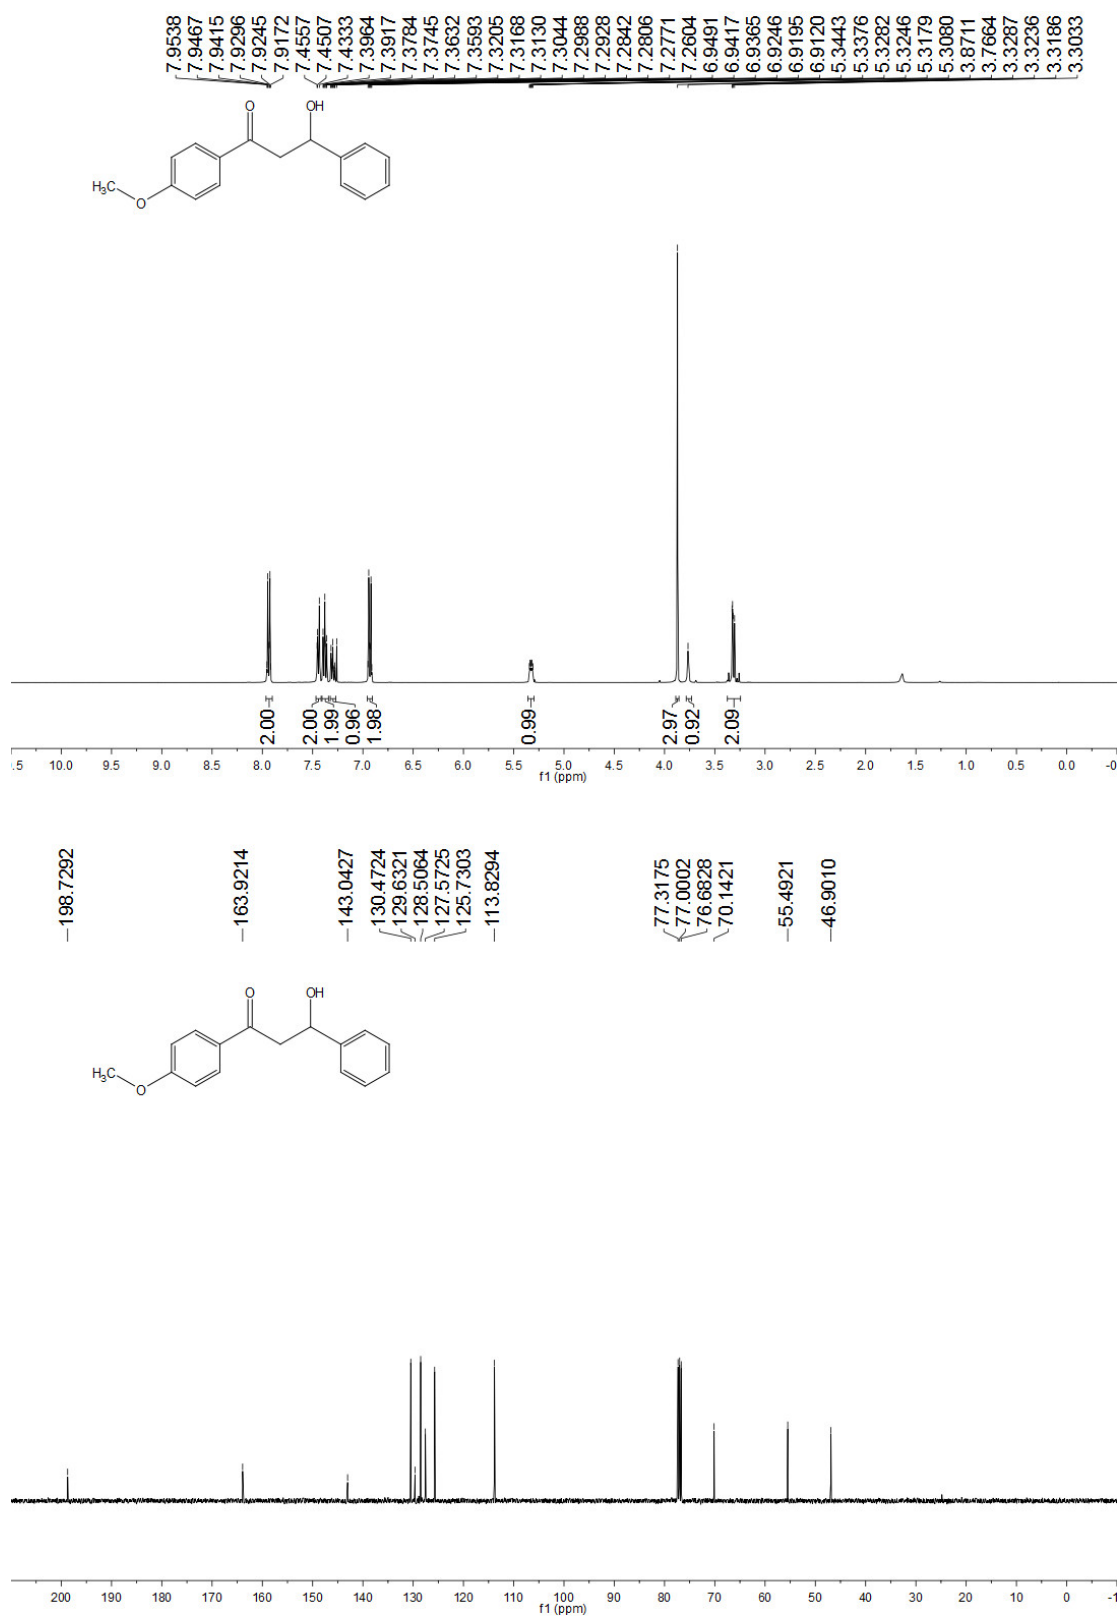

Figure S11. <sup>1</sup>H NMR and <sup>13</sup>C NMR spectra of 3i.

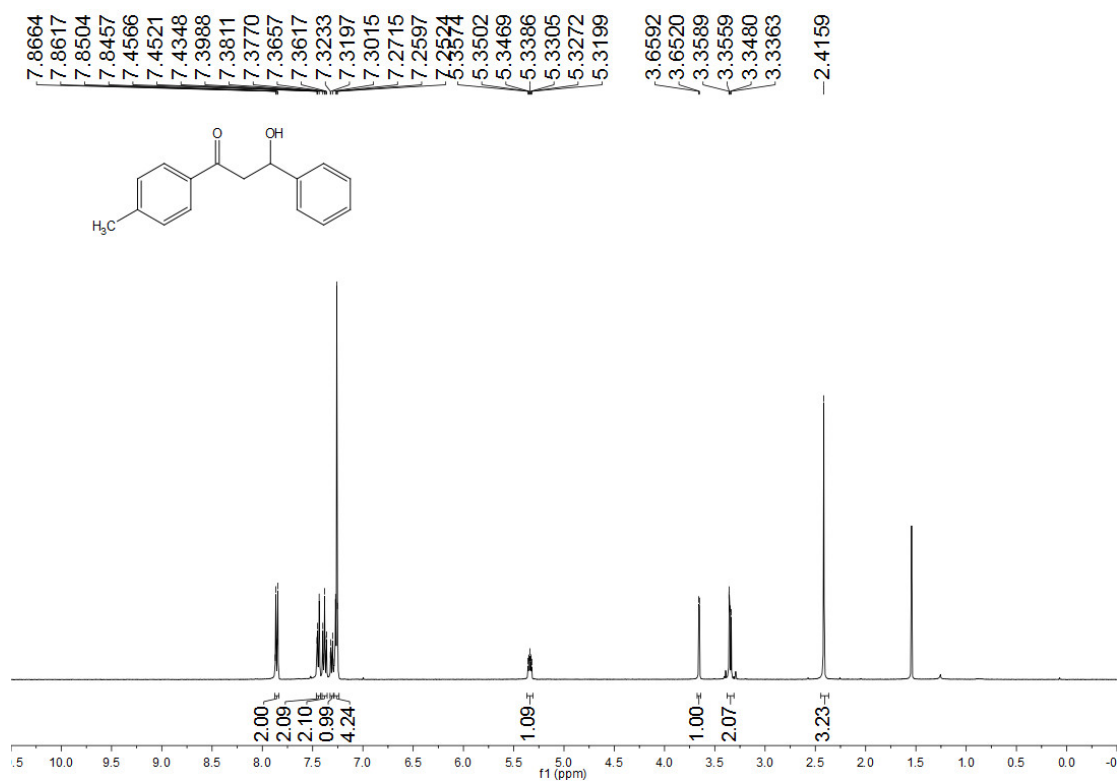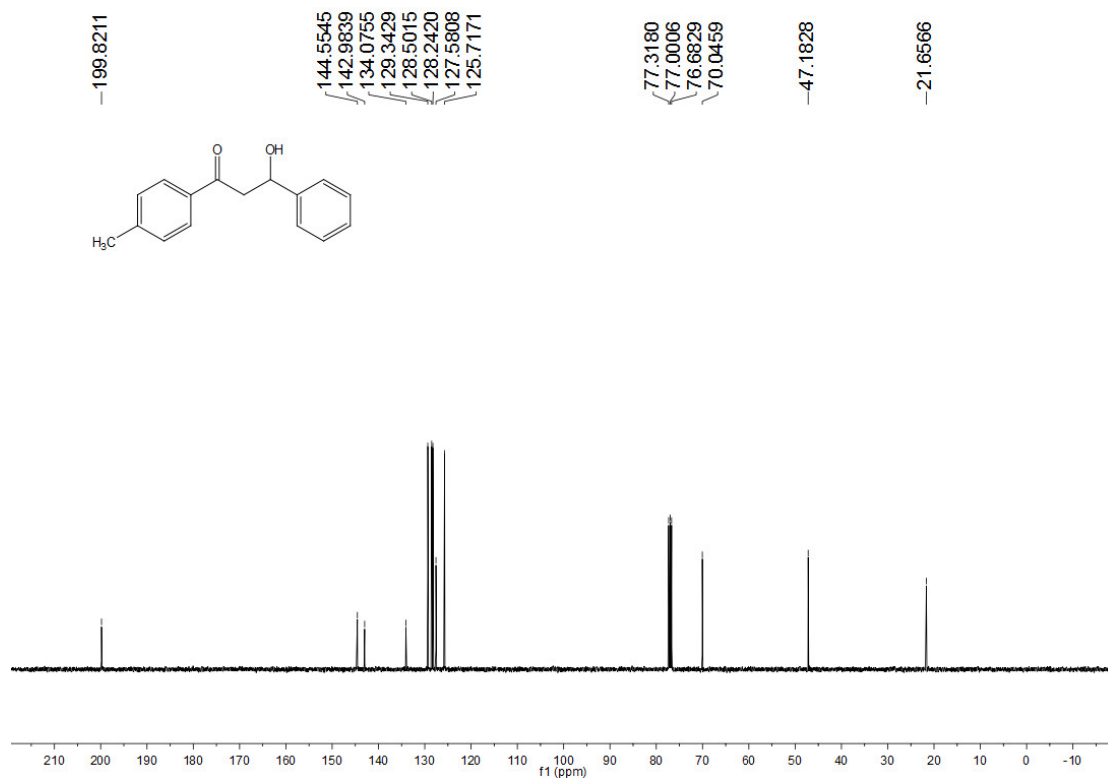

**Figure S12.** <sup>1</sup>H NMR and <sup>13</sup>C NMR spectra of 3j.

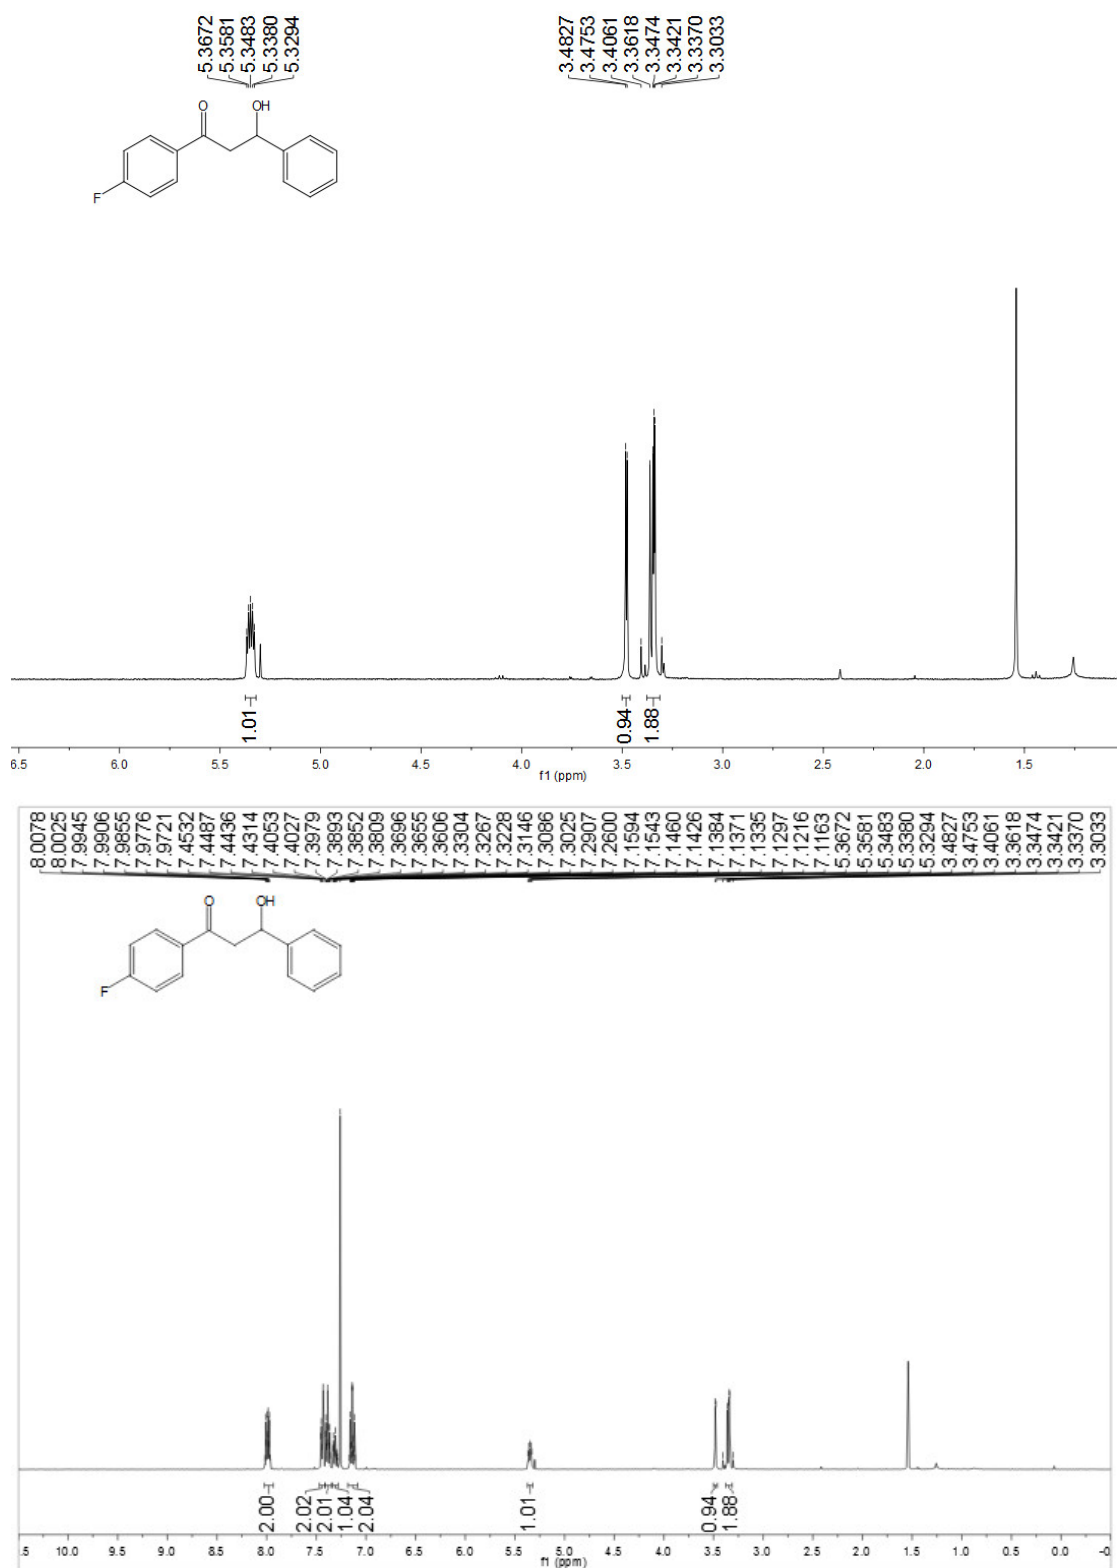

Figure S13. <sup>1</sup>H NMR and <sup>13</sup>C NMR spectra of 3k.

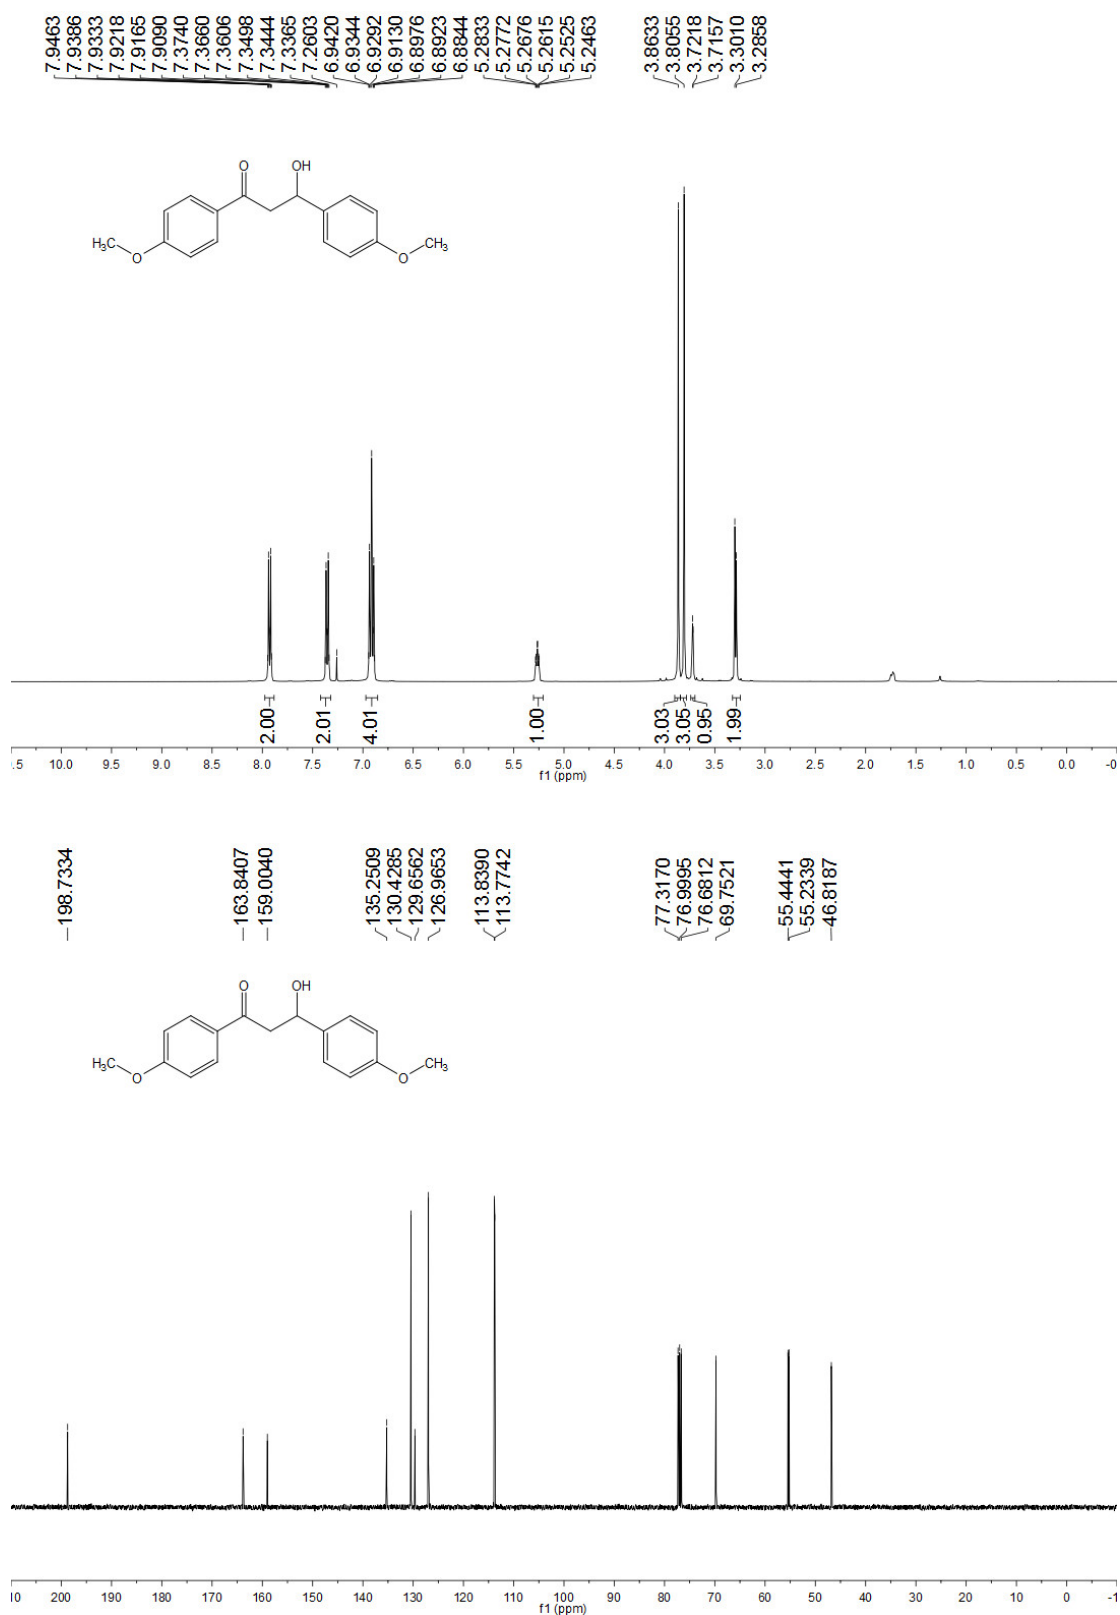

Figure S14. <sup>1</sup>H NMR and <sup>13</sup>C NMR spectra of 31.

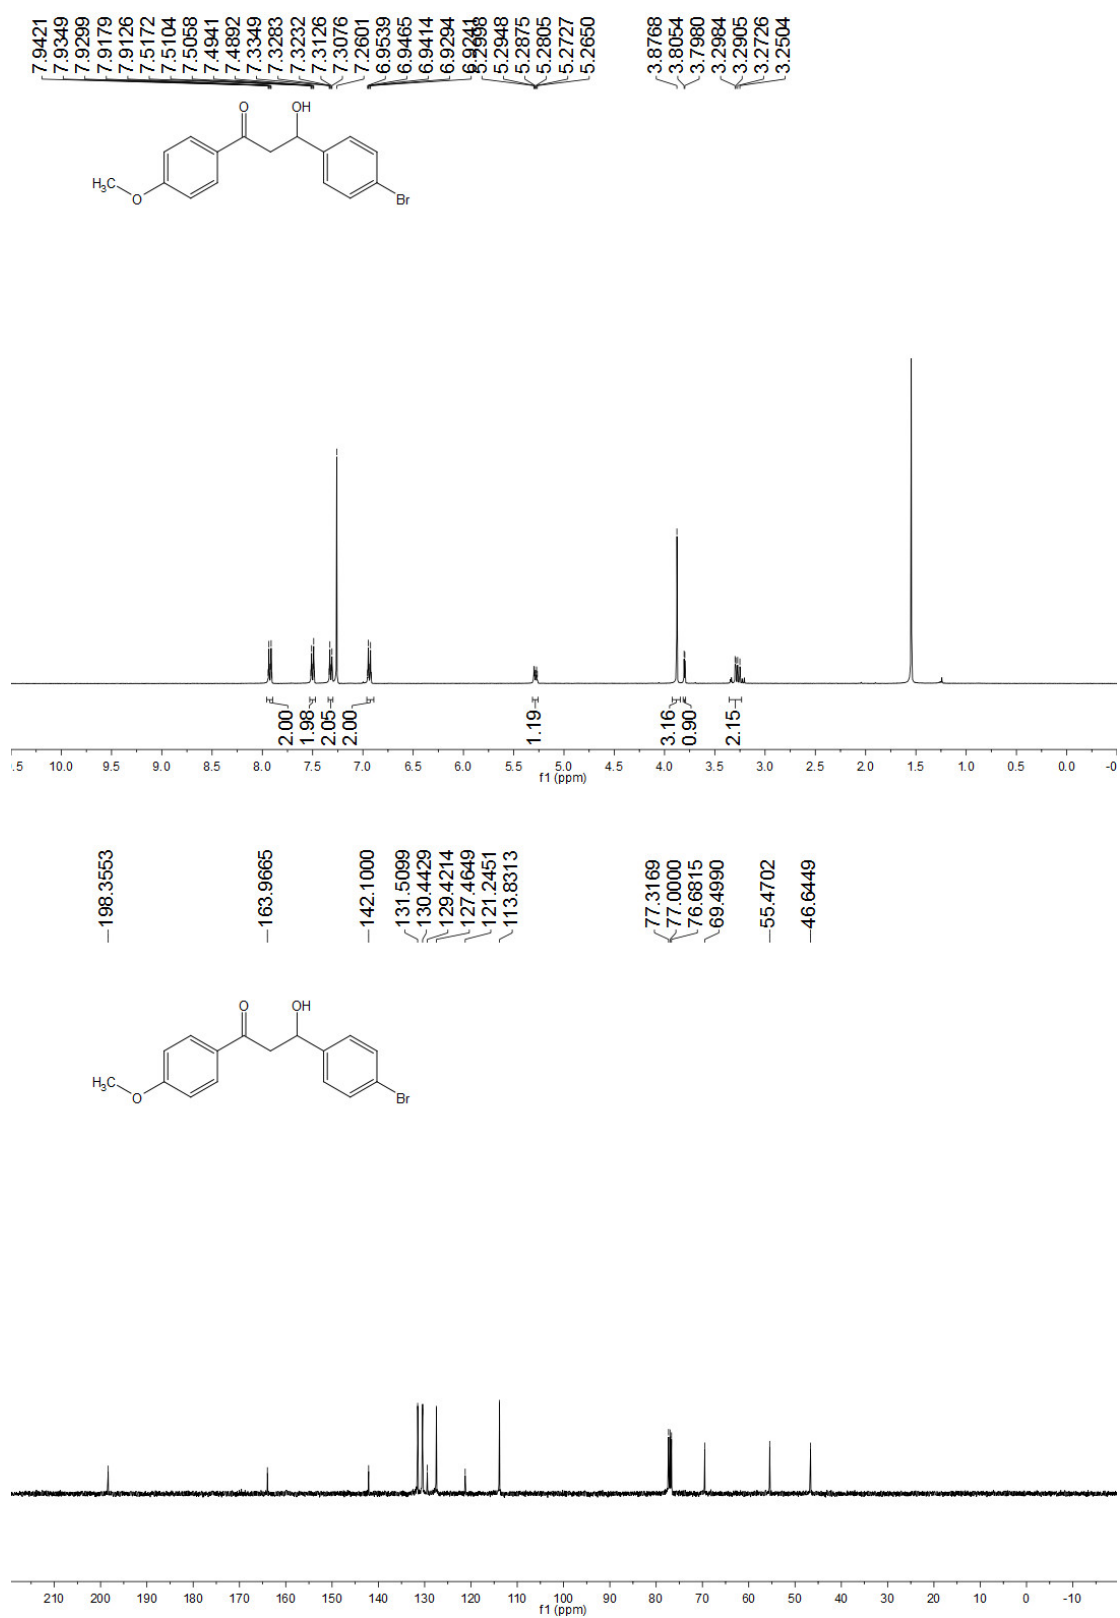

Figure S15. <sup>1</sup>H NMR and <sup>13</sup>C NMR spectra of 3m.

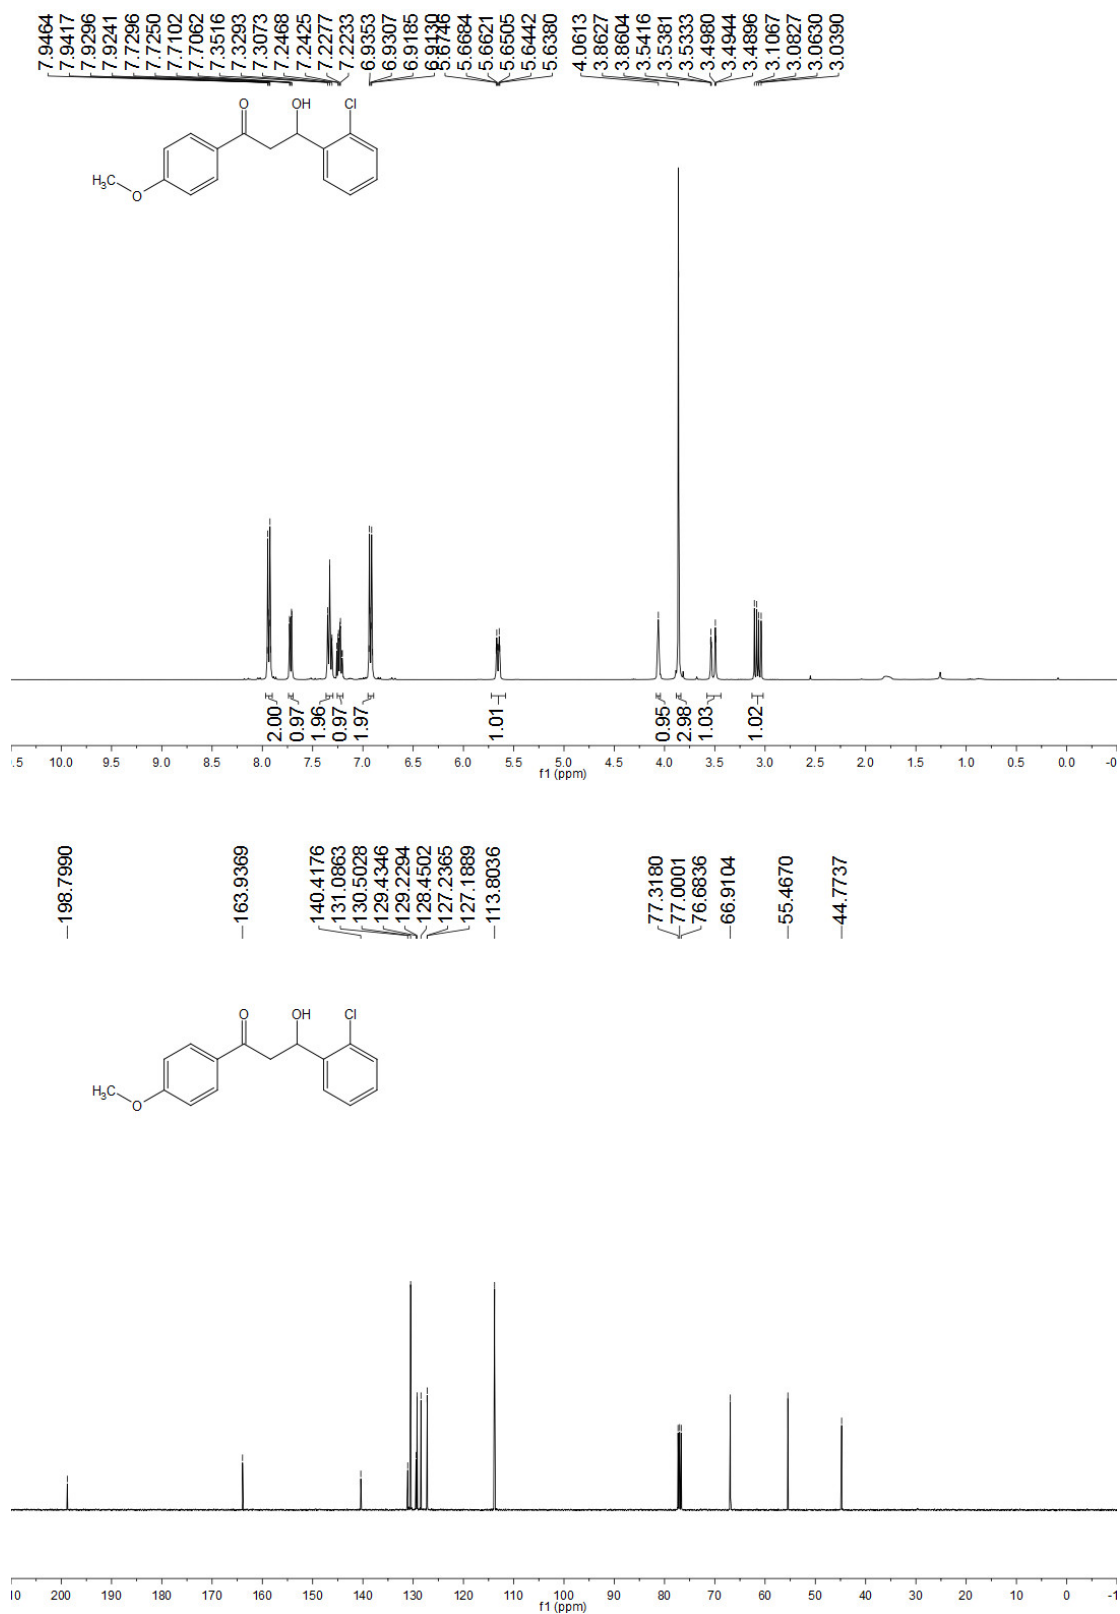

**Figure S16.** <sup>1</sup>H NMR and <sup>13</sup>C NMR spectra of 3n.

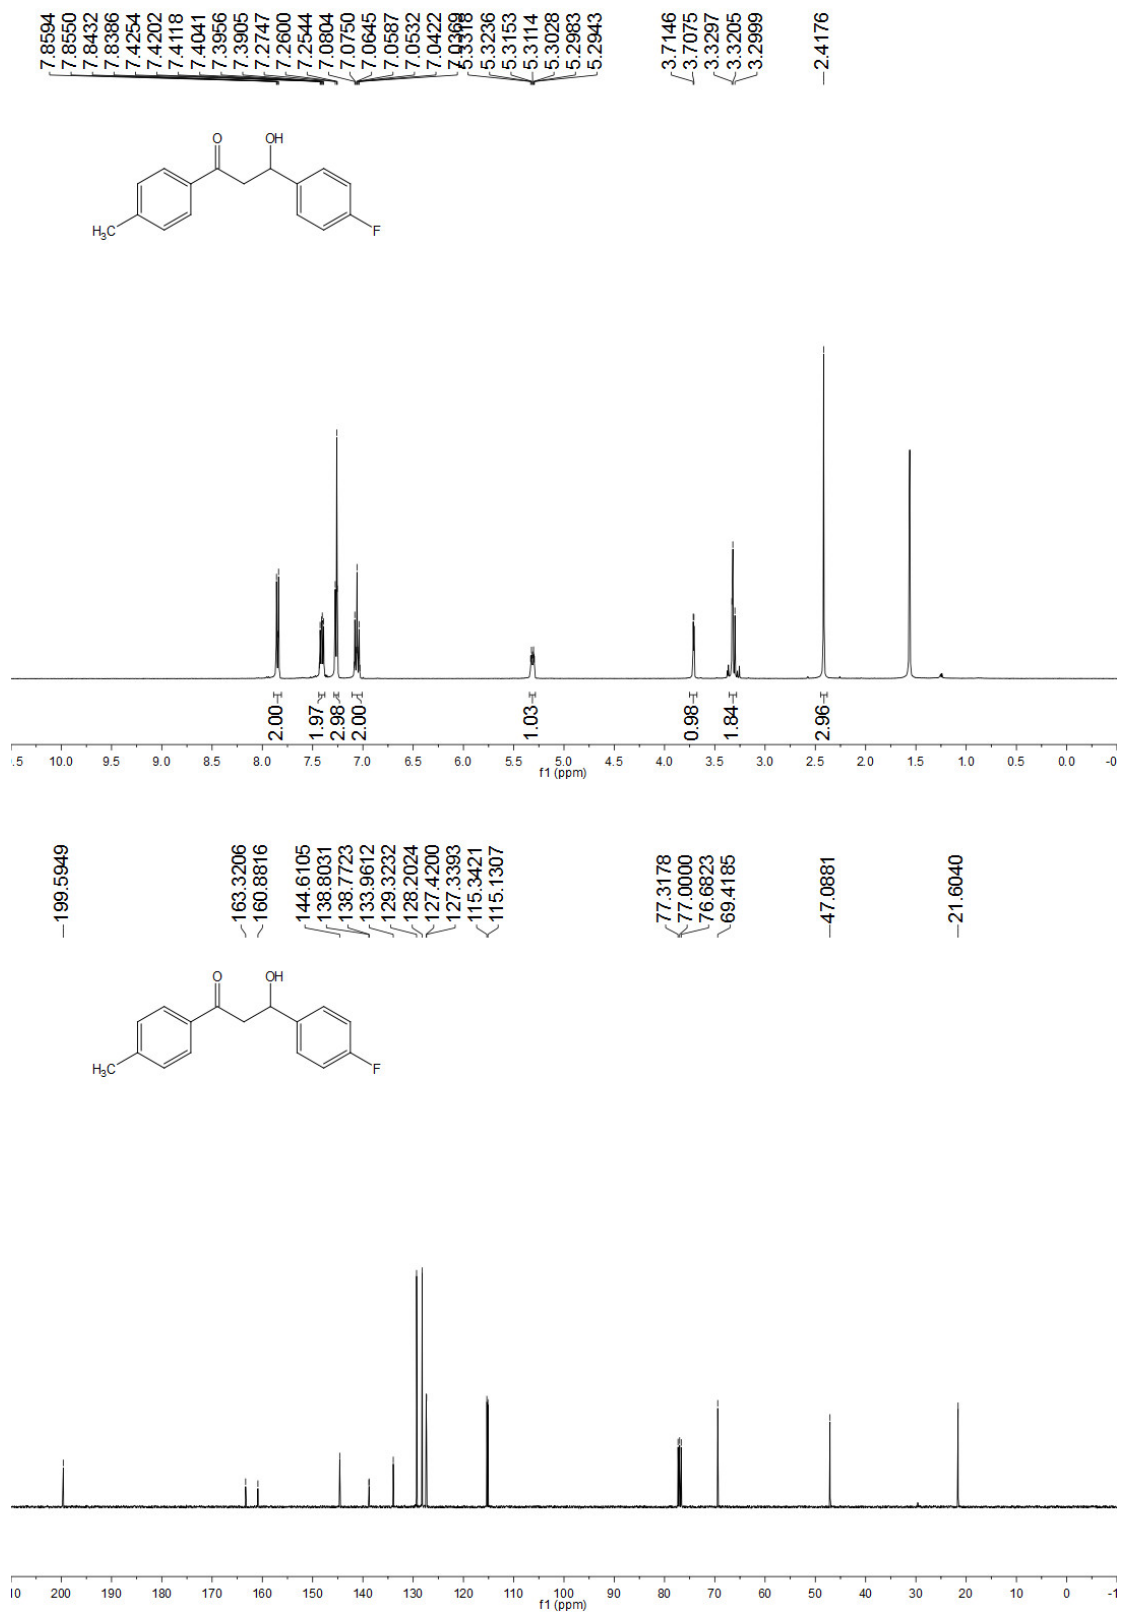

Figure S17. <sup>1</sup>H NMR and <sup>13</sup>C NMR spectra of **30**.

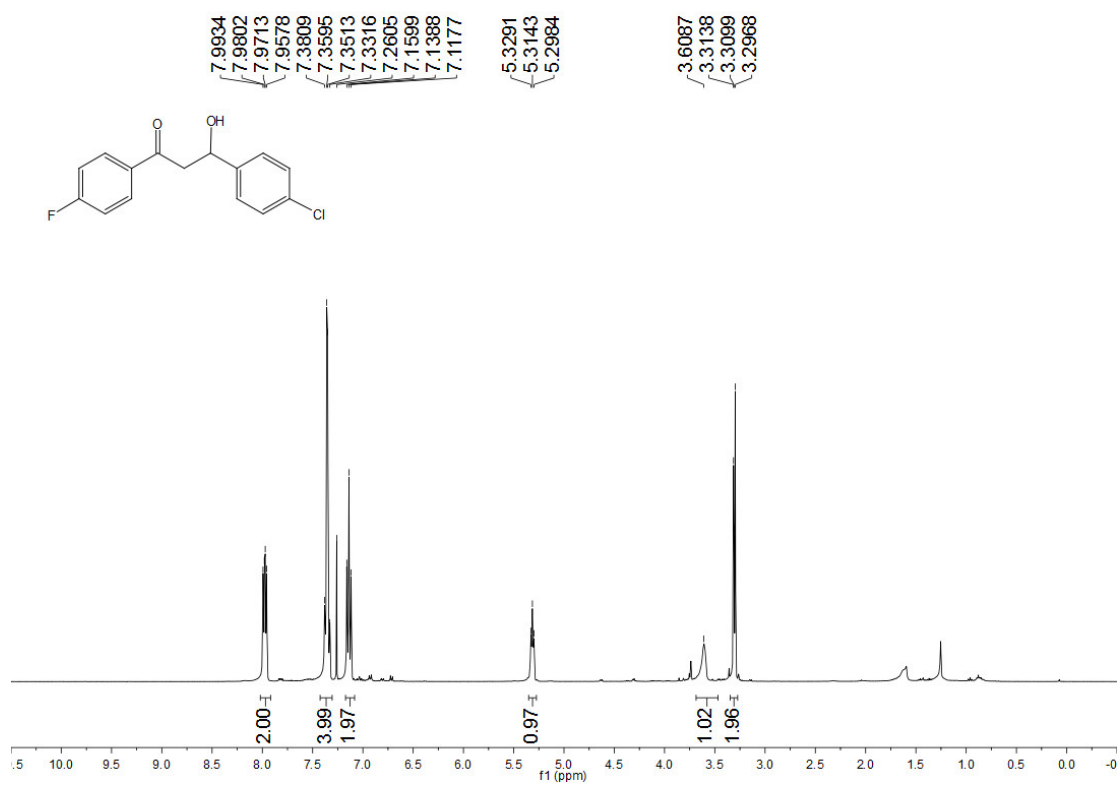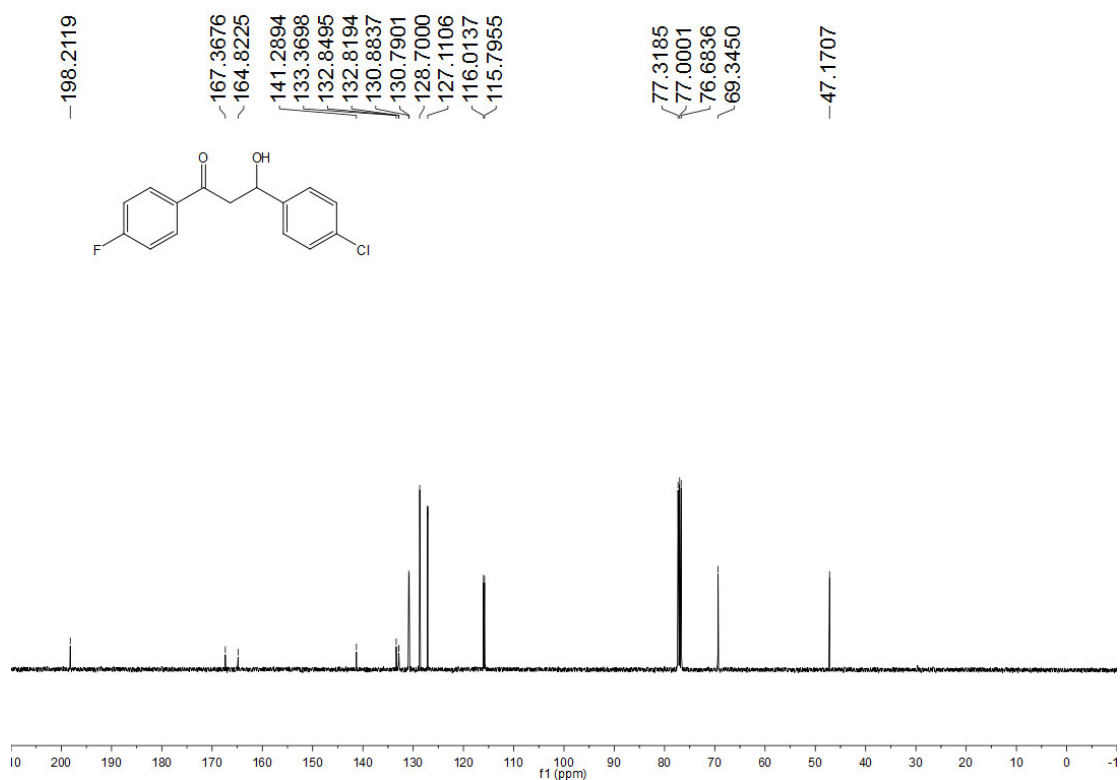

**Figure S18.** <sup>1</sup>H NMR and <sup>13</sup>C NMR spectra of 3p.



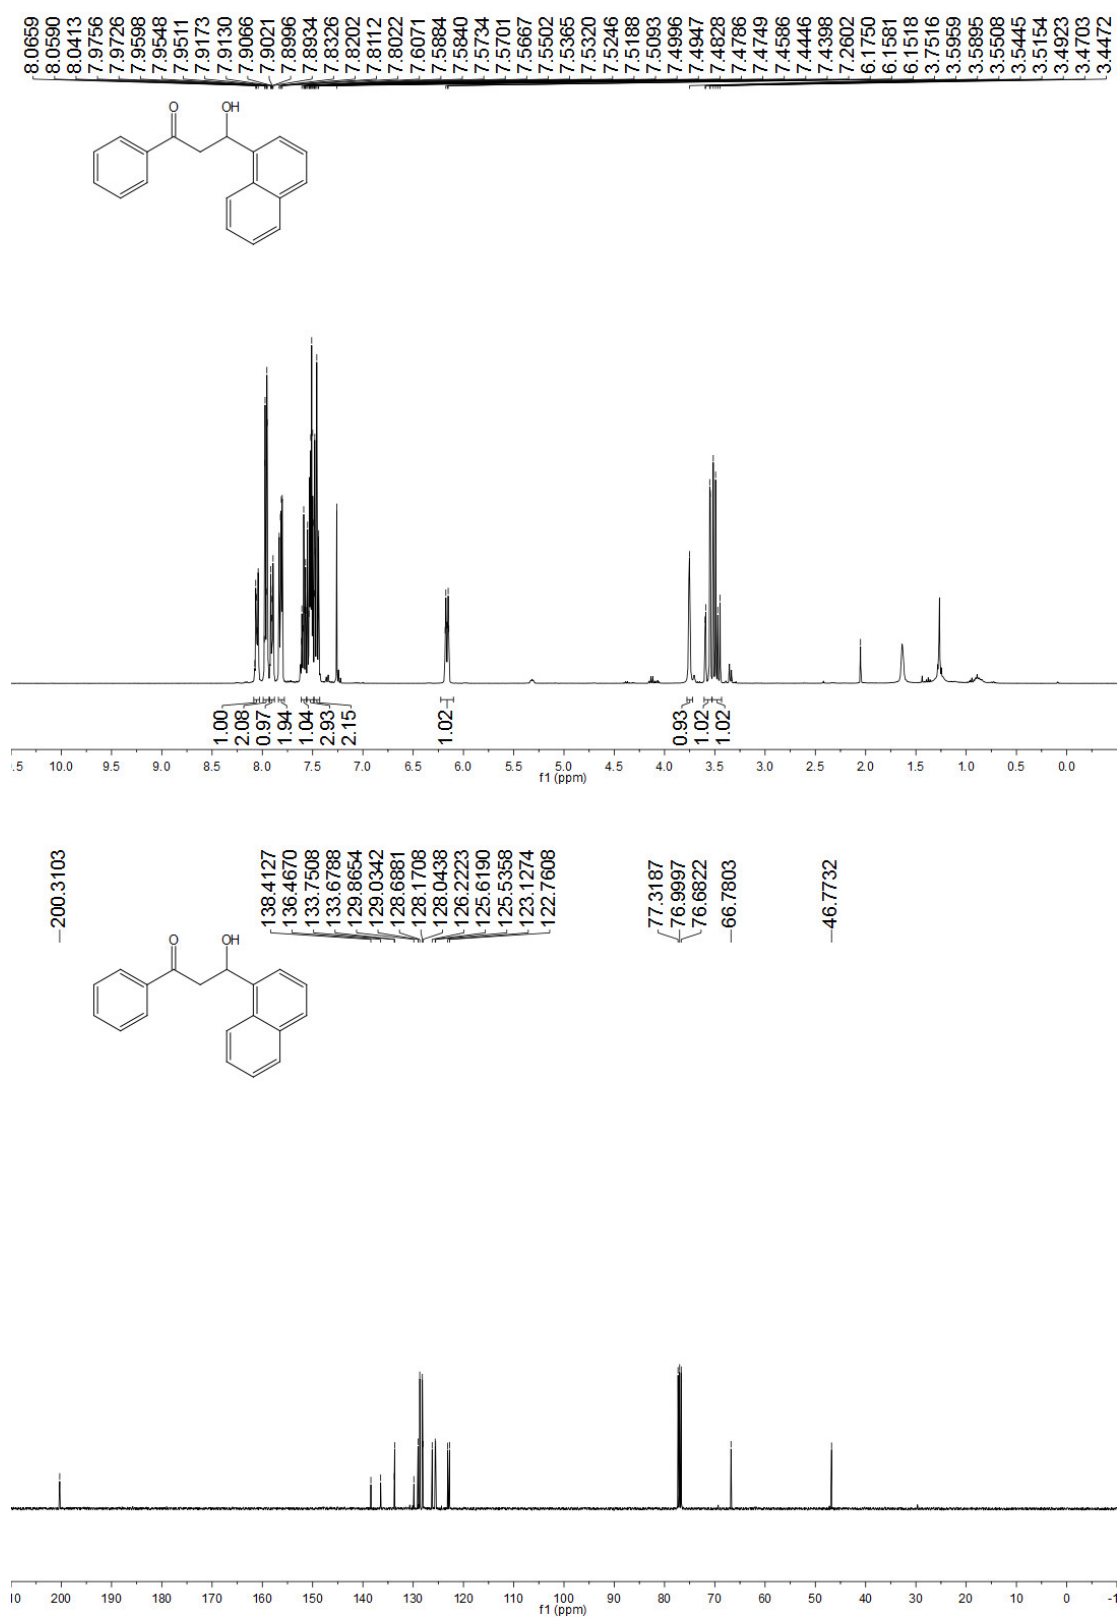

Figure S19. <sup>1</sup>H NMR and <sup>13</sup>C NMR spectra of 3q.

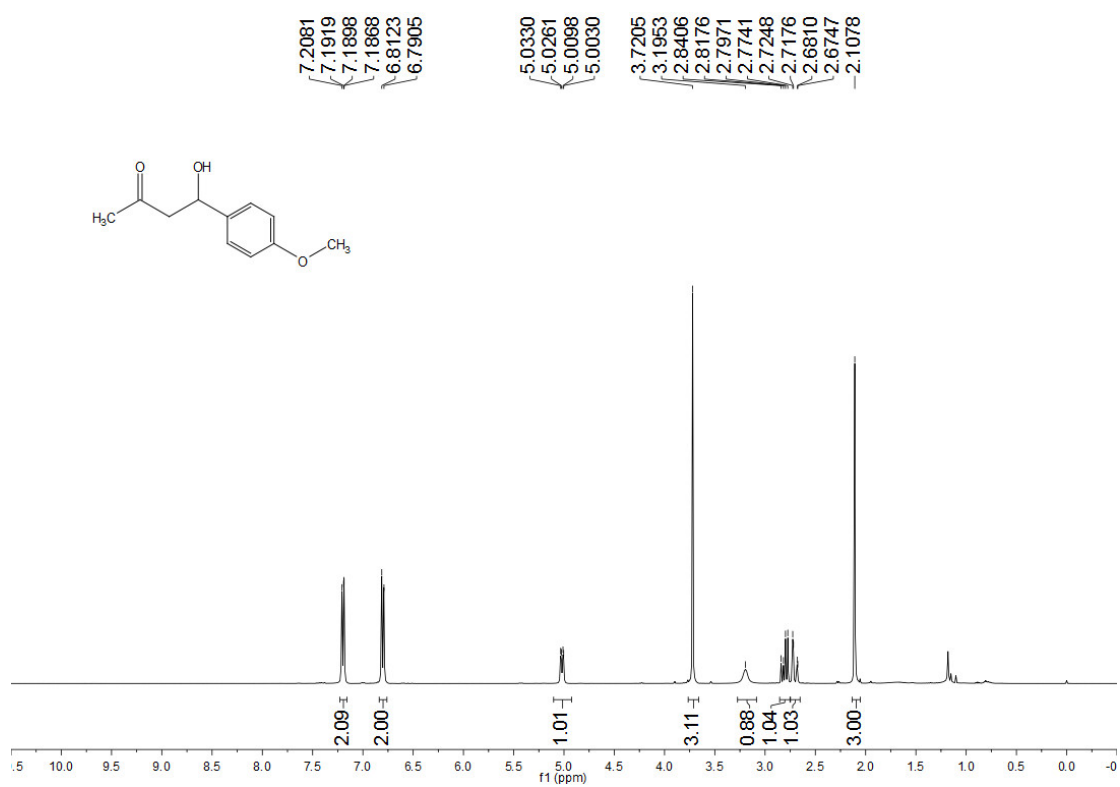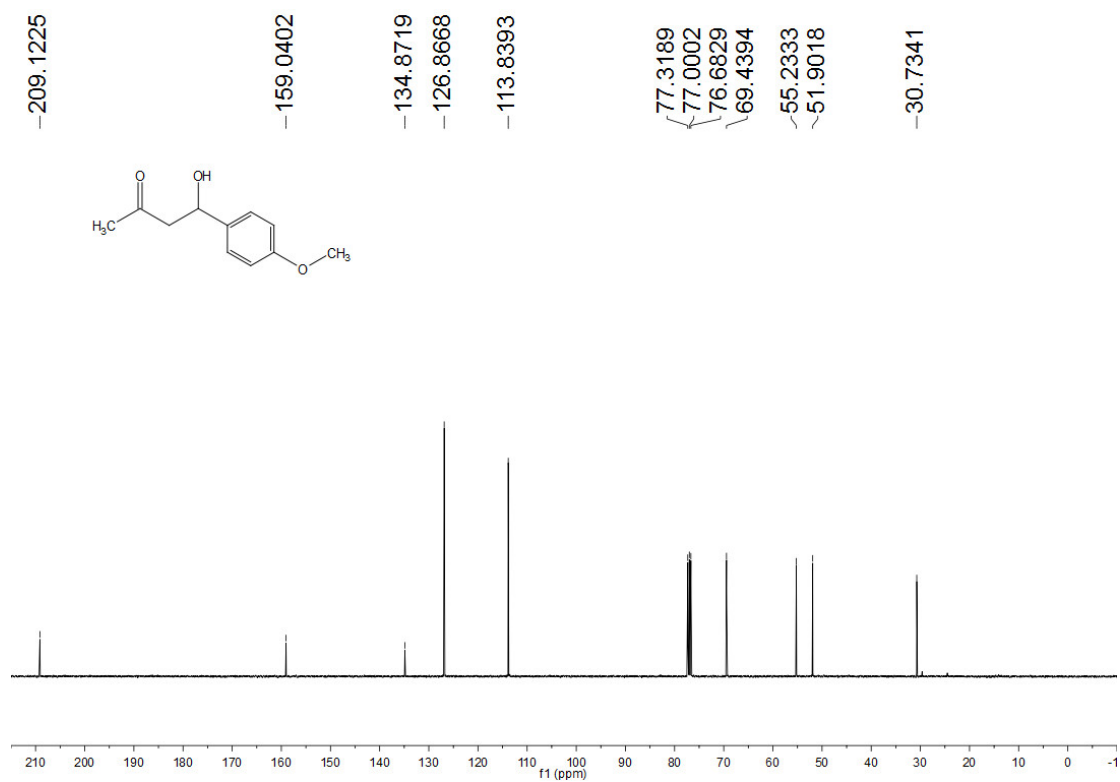

**Figure S20.** <sup>1</sup>H NMR and <sup>13</sup>C NMR spectra of 3r.

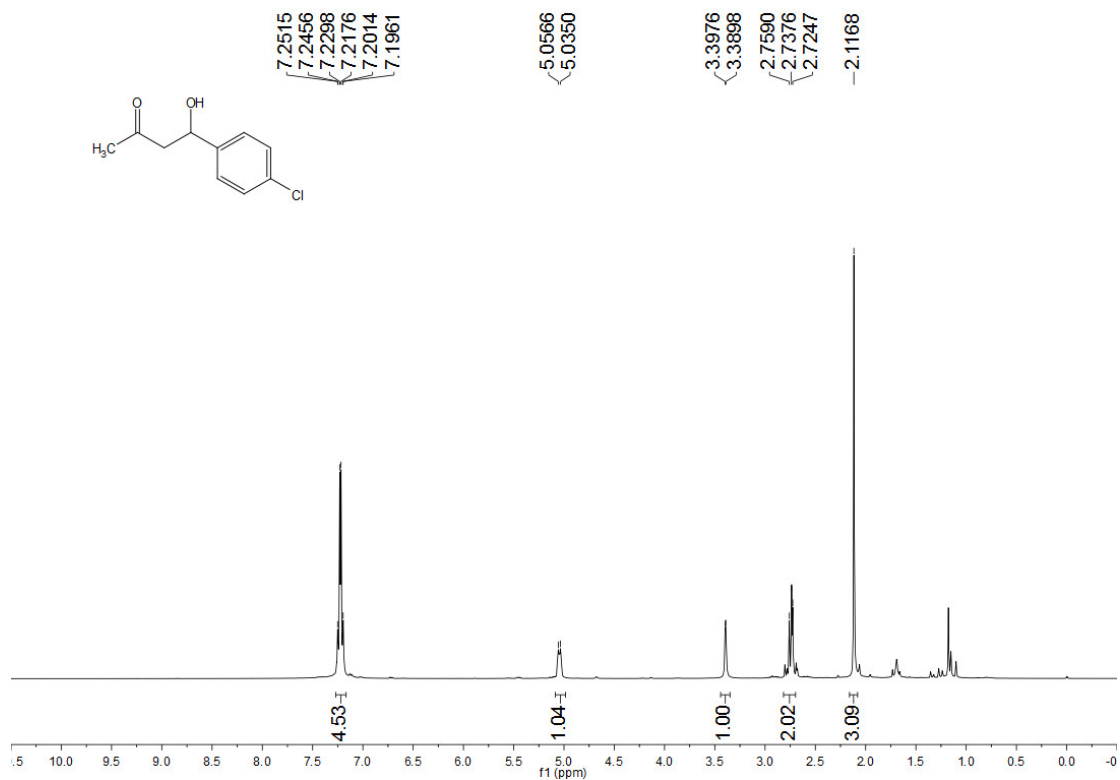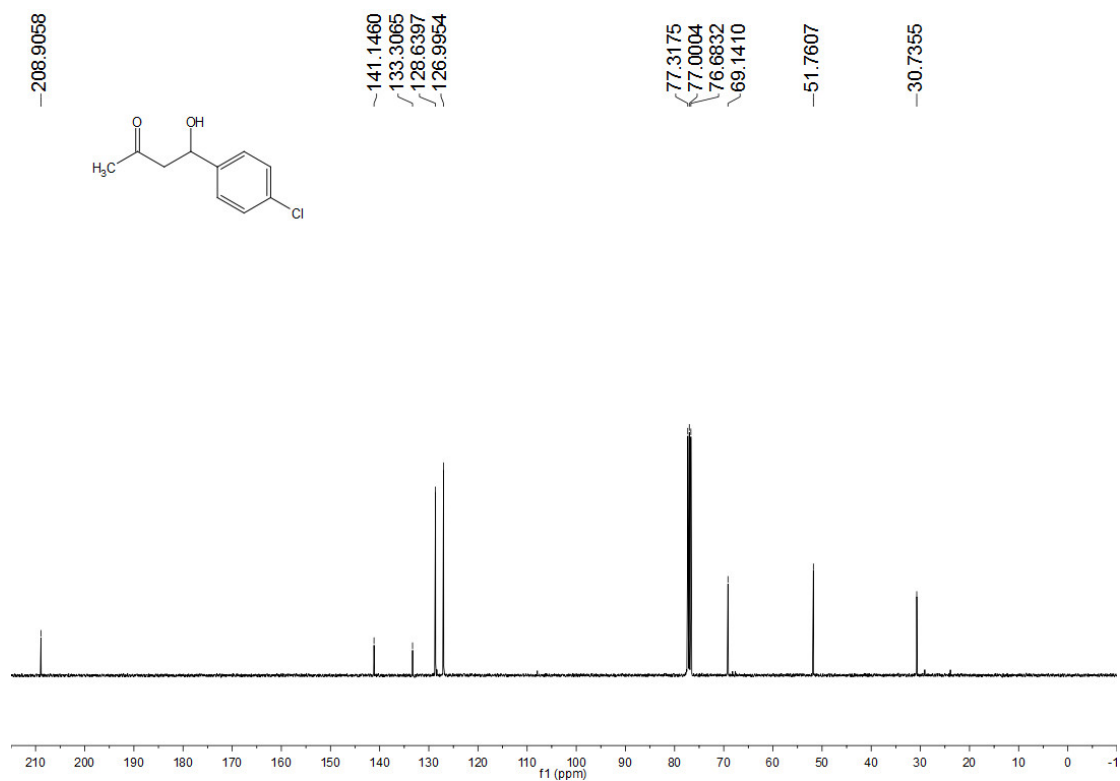

Figure S21. <sup>1</sup>H NMR and <sup>13</sup>C NMR spectra of 3s.

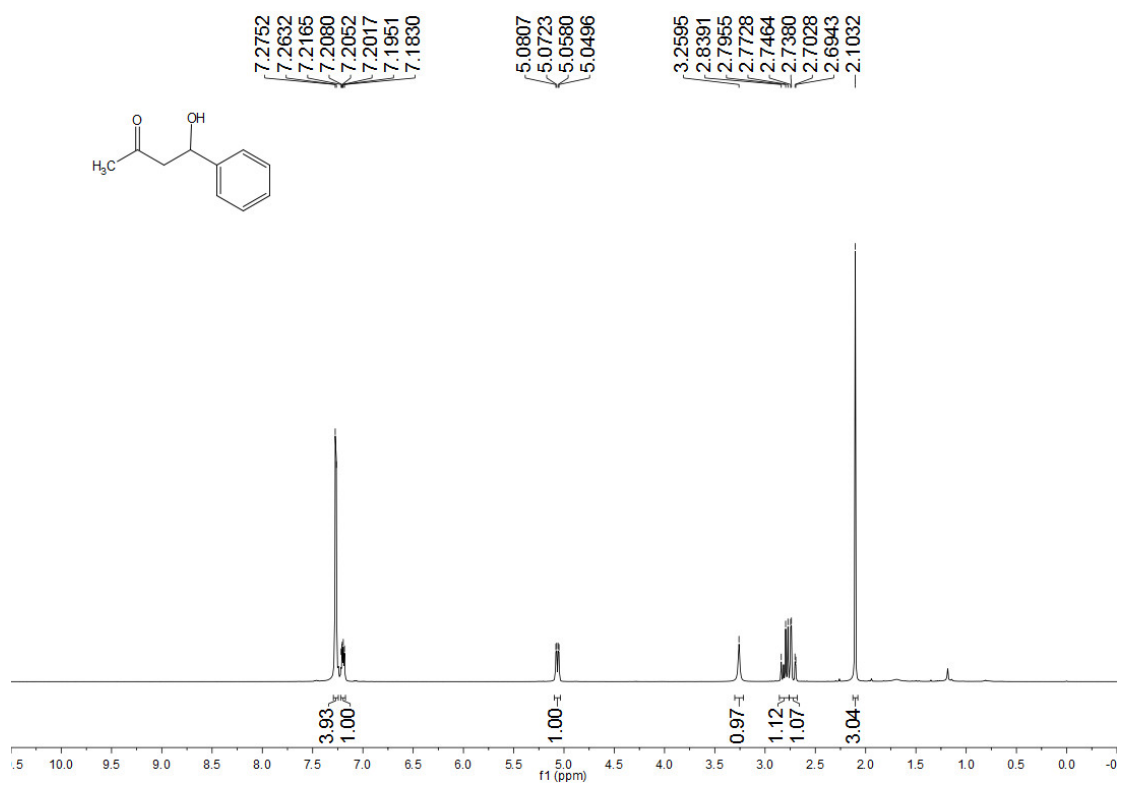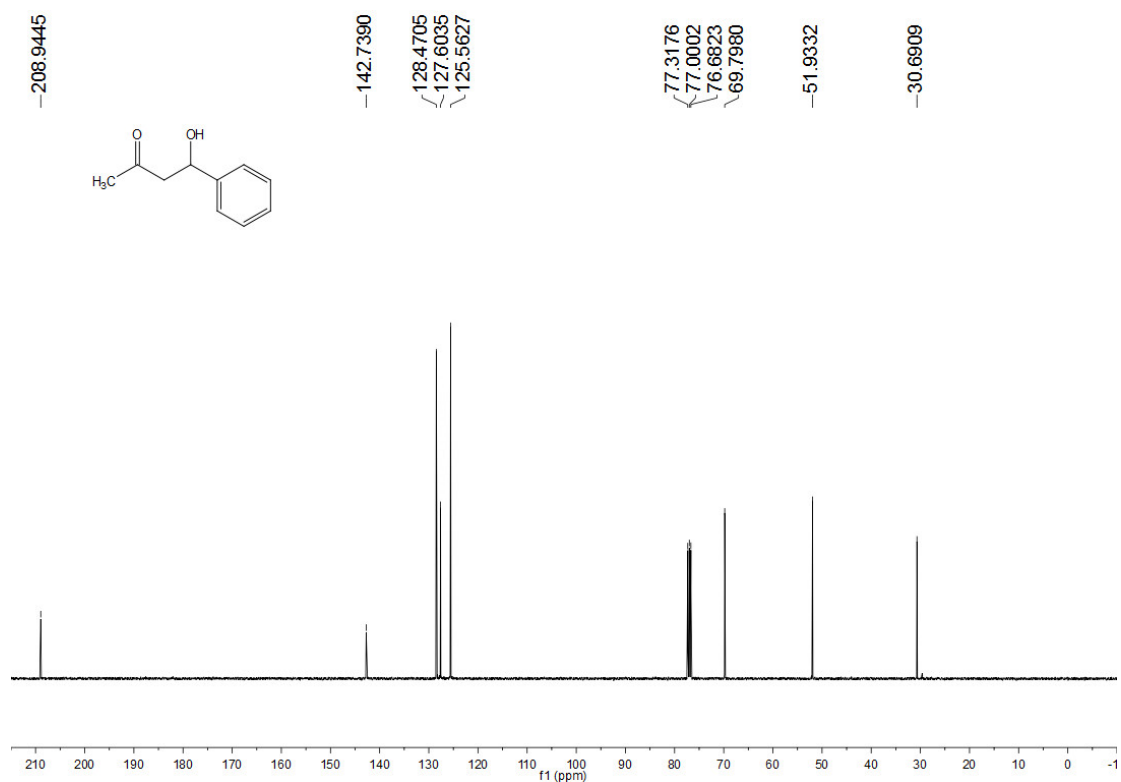

Figure S22. <sup>1</sup>H NMR and <sup>13</sup>C NMR spectra of 3t.

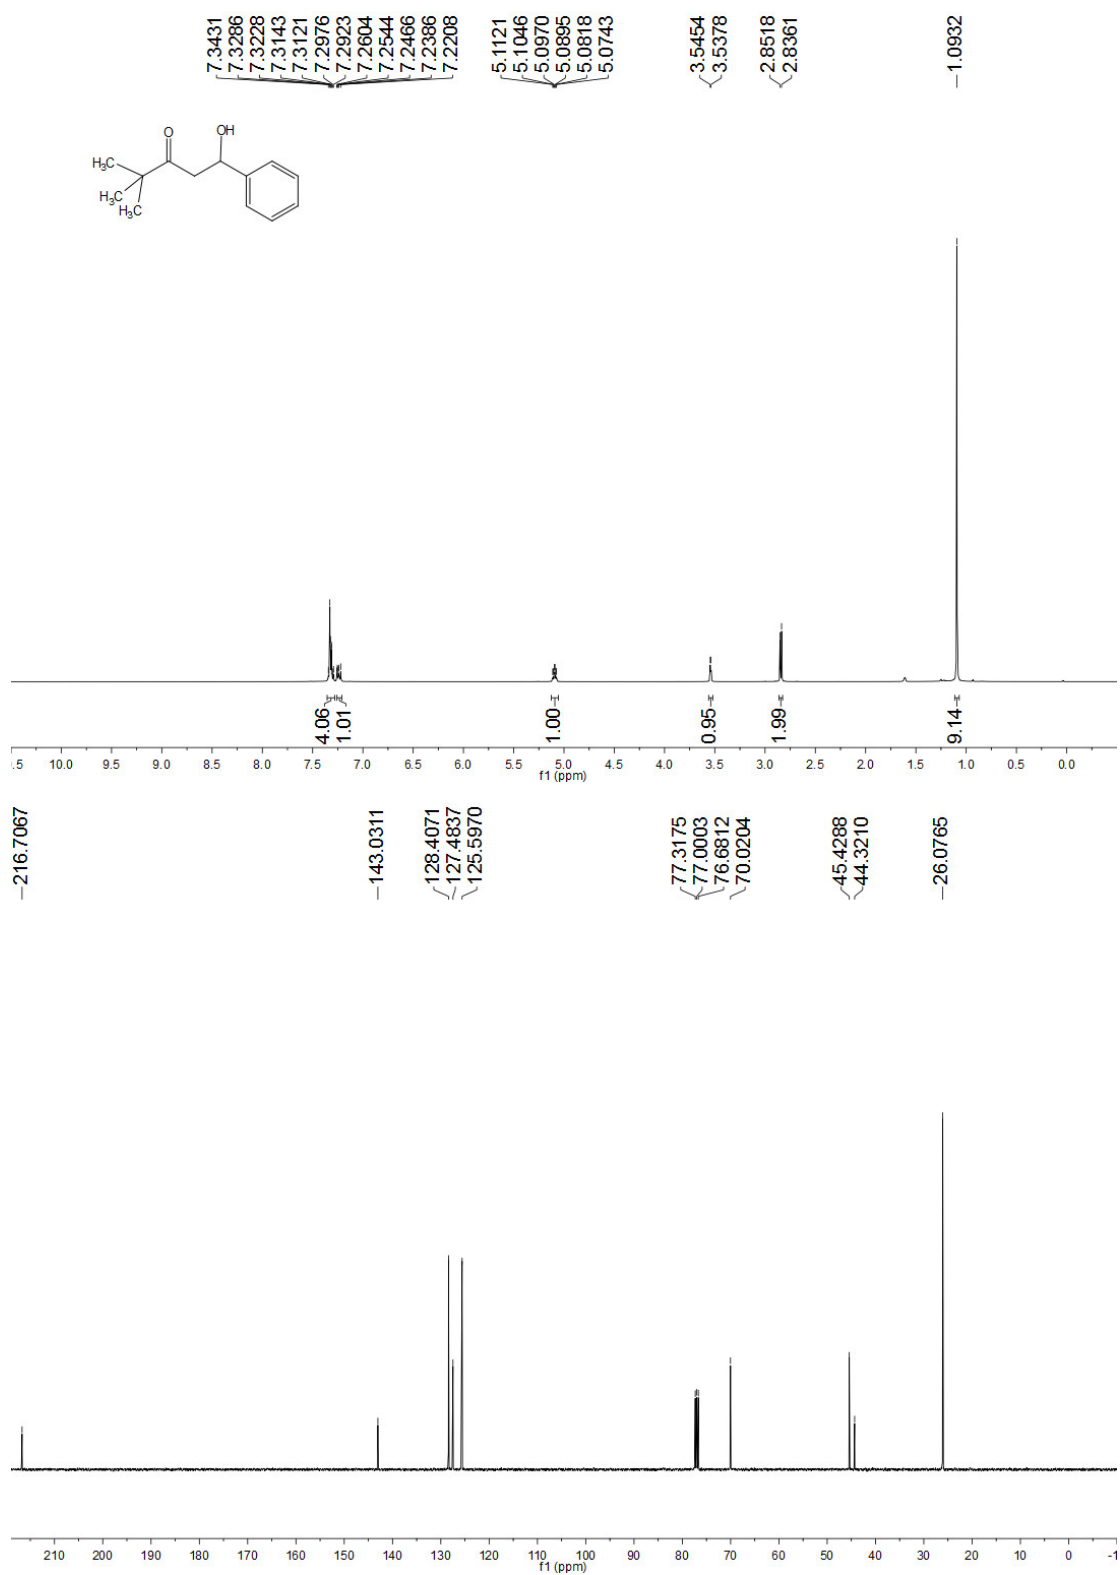

Figure S23. <sup>1</sup>H NMR and <sup>13</sup>C NMR spectra of 3u.

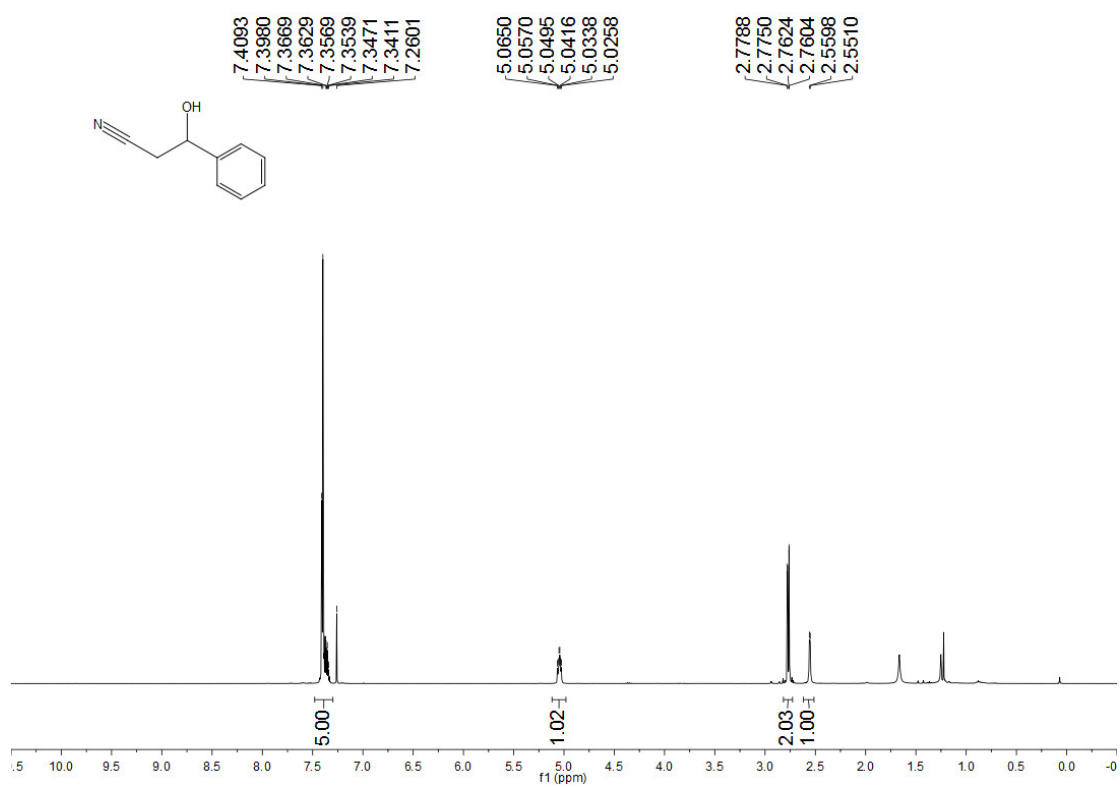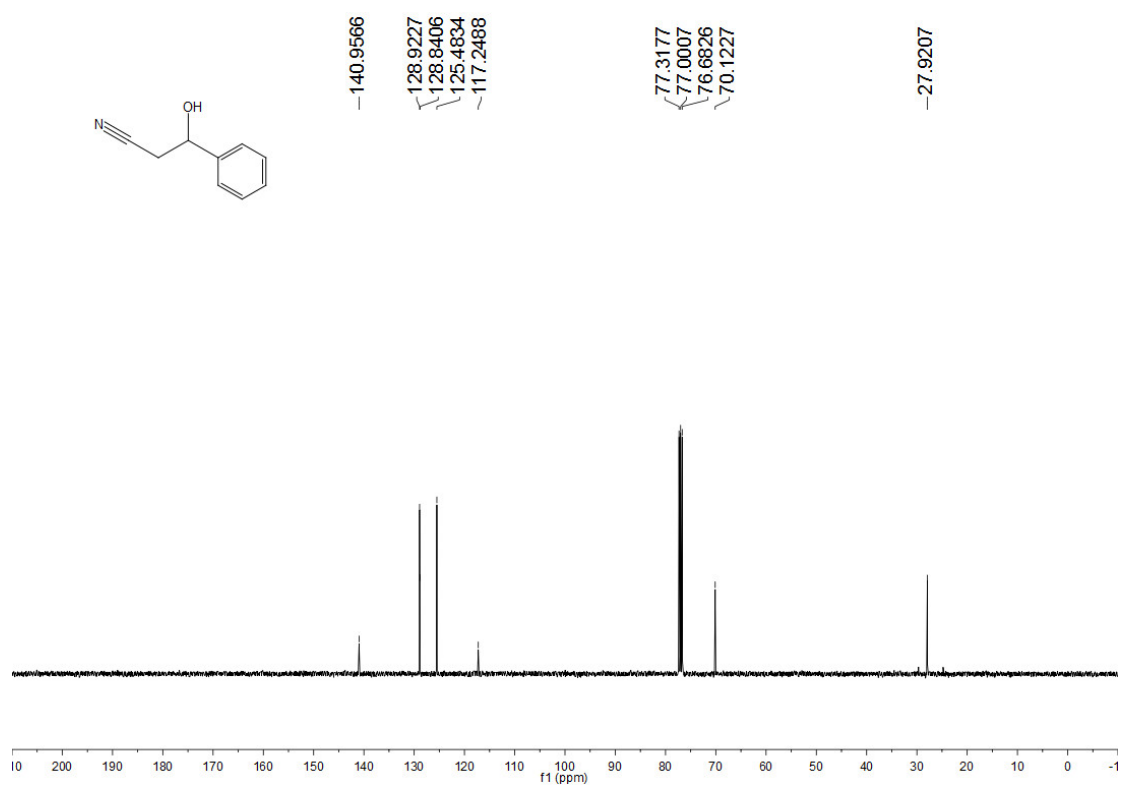

Figure S24. <sup>1</sup>H NMR and <sup>13</sup>C NMR spectra of 3v.

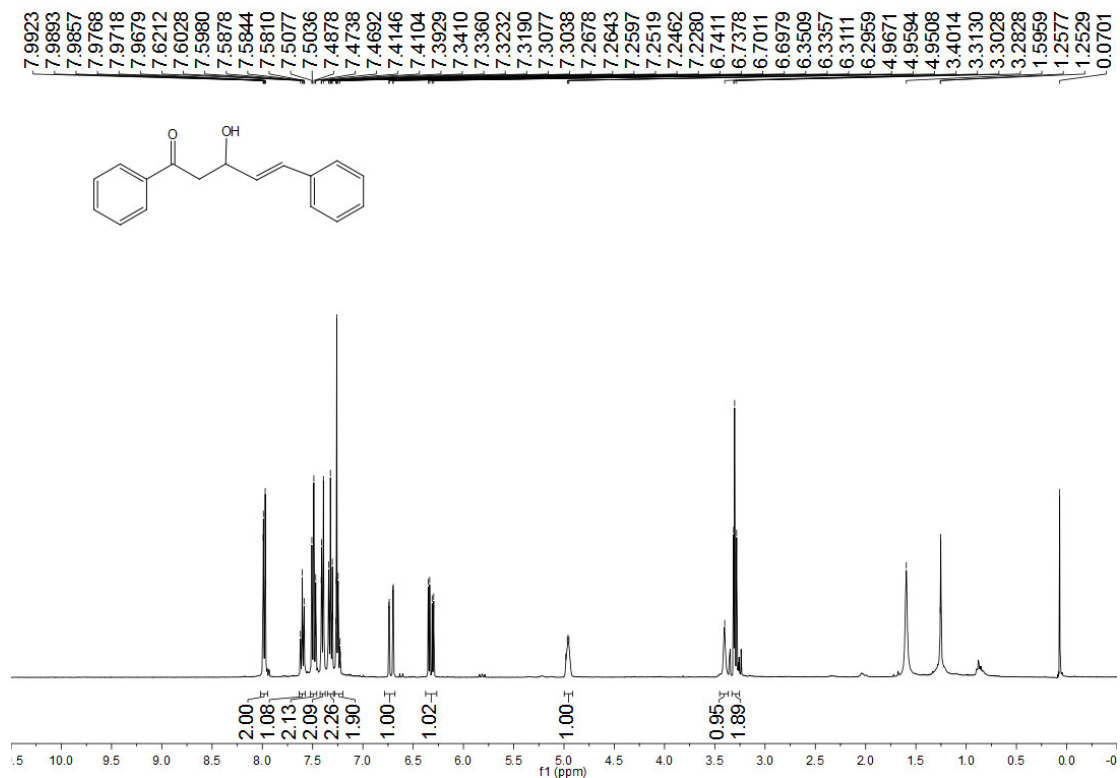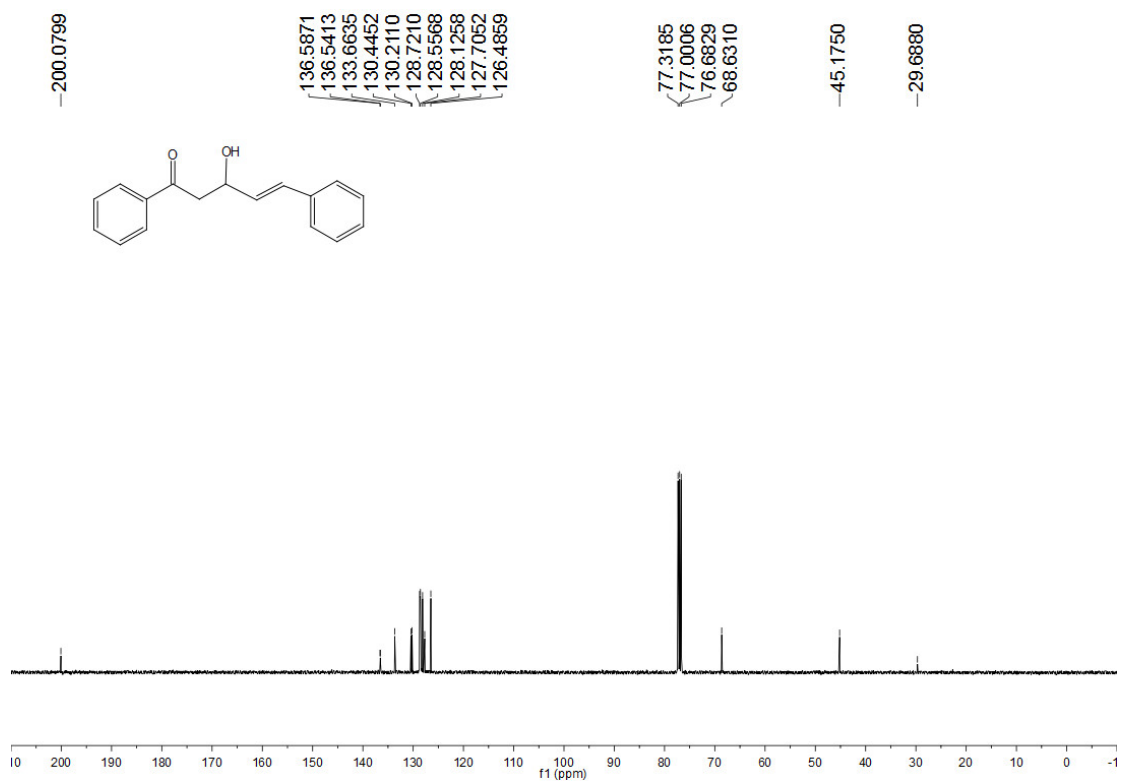

Figure S25. <sup>1</sup>H NMR and <sup>13</sup>C NMR spectra of 3w.

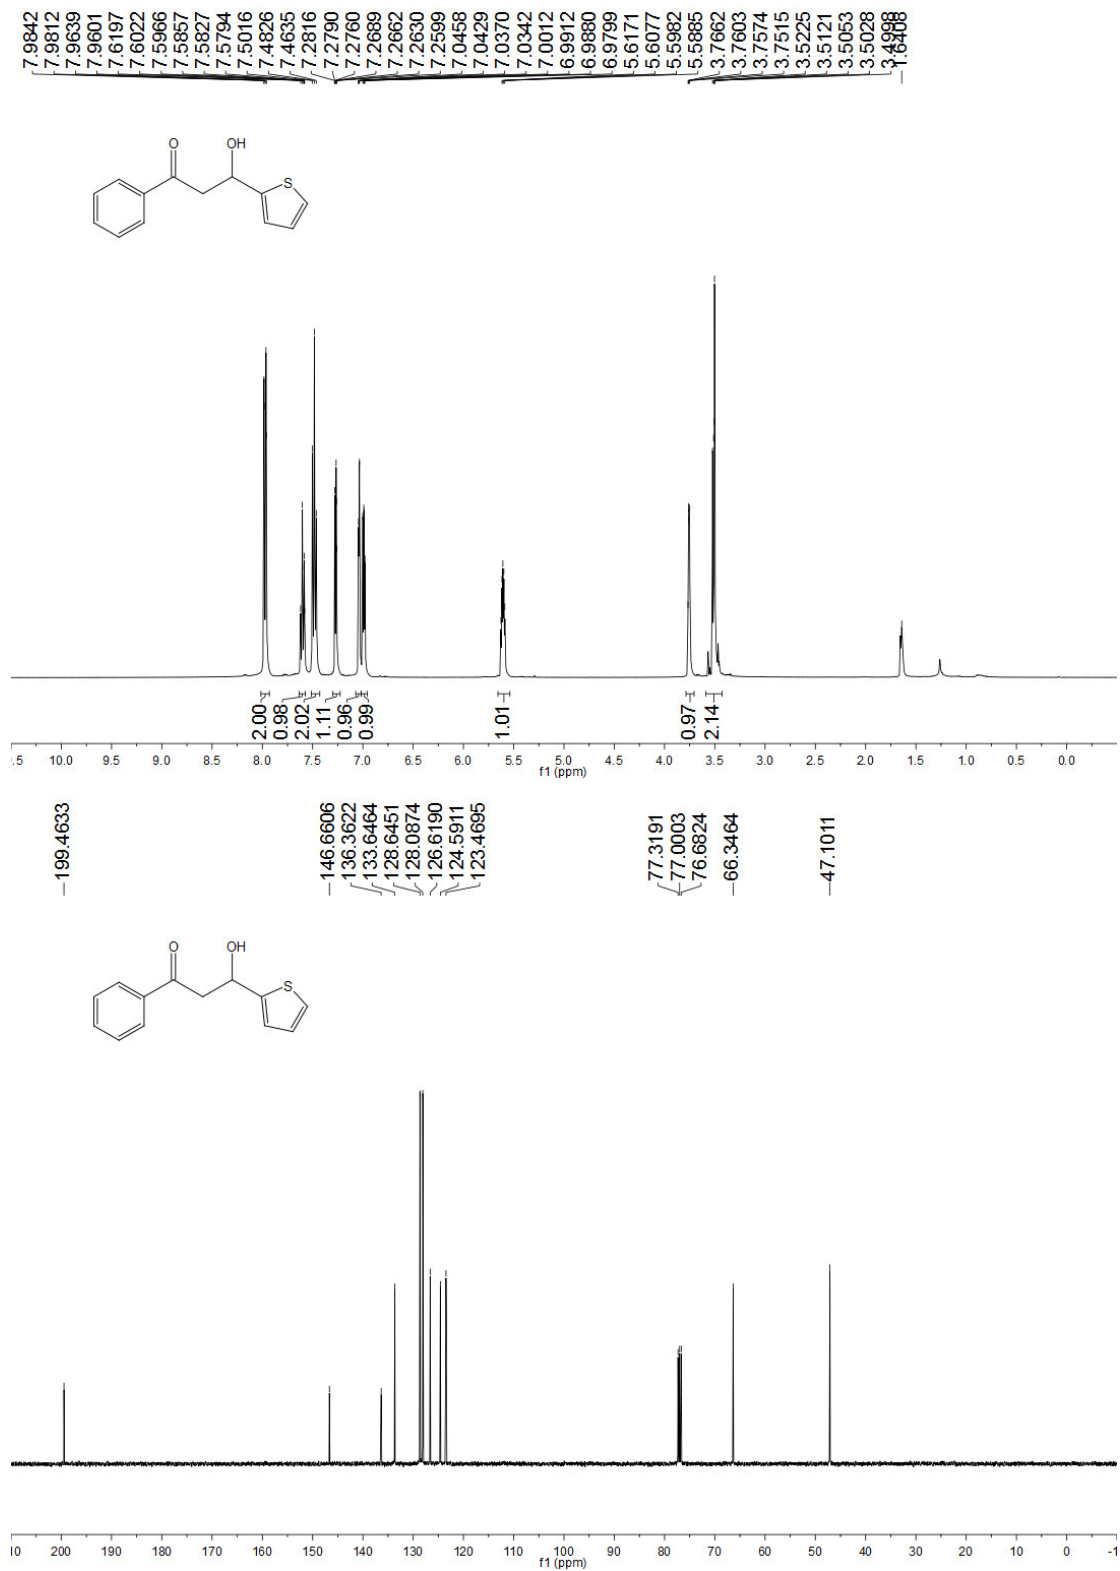

Figure S26. <sup>1</sup>H NMR and <sup>13</sup>C NMR spectra of 3x.



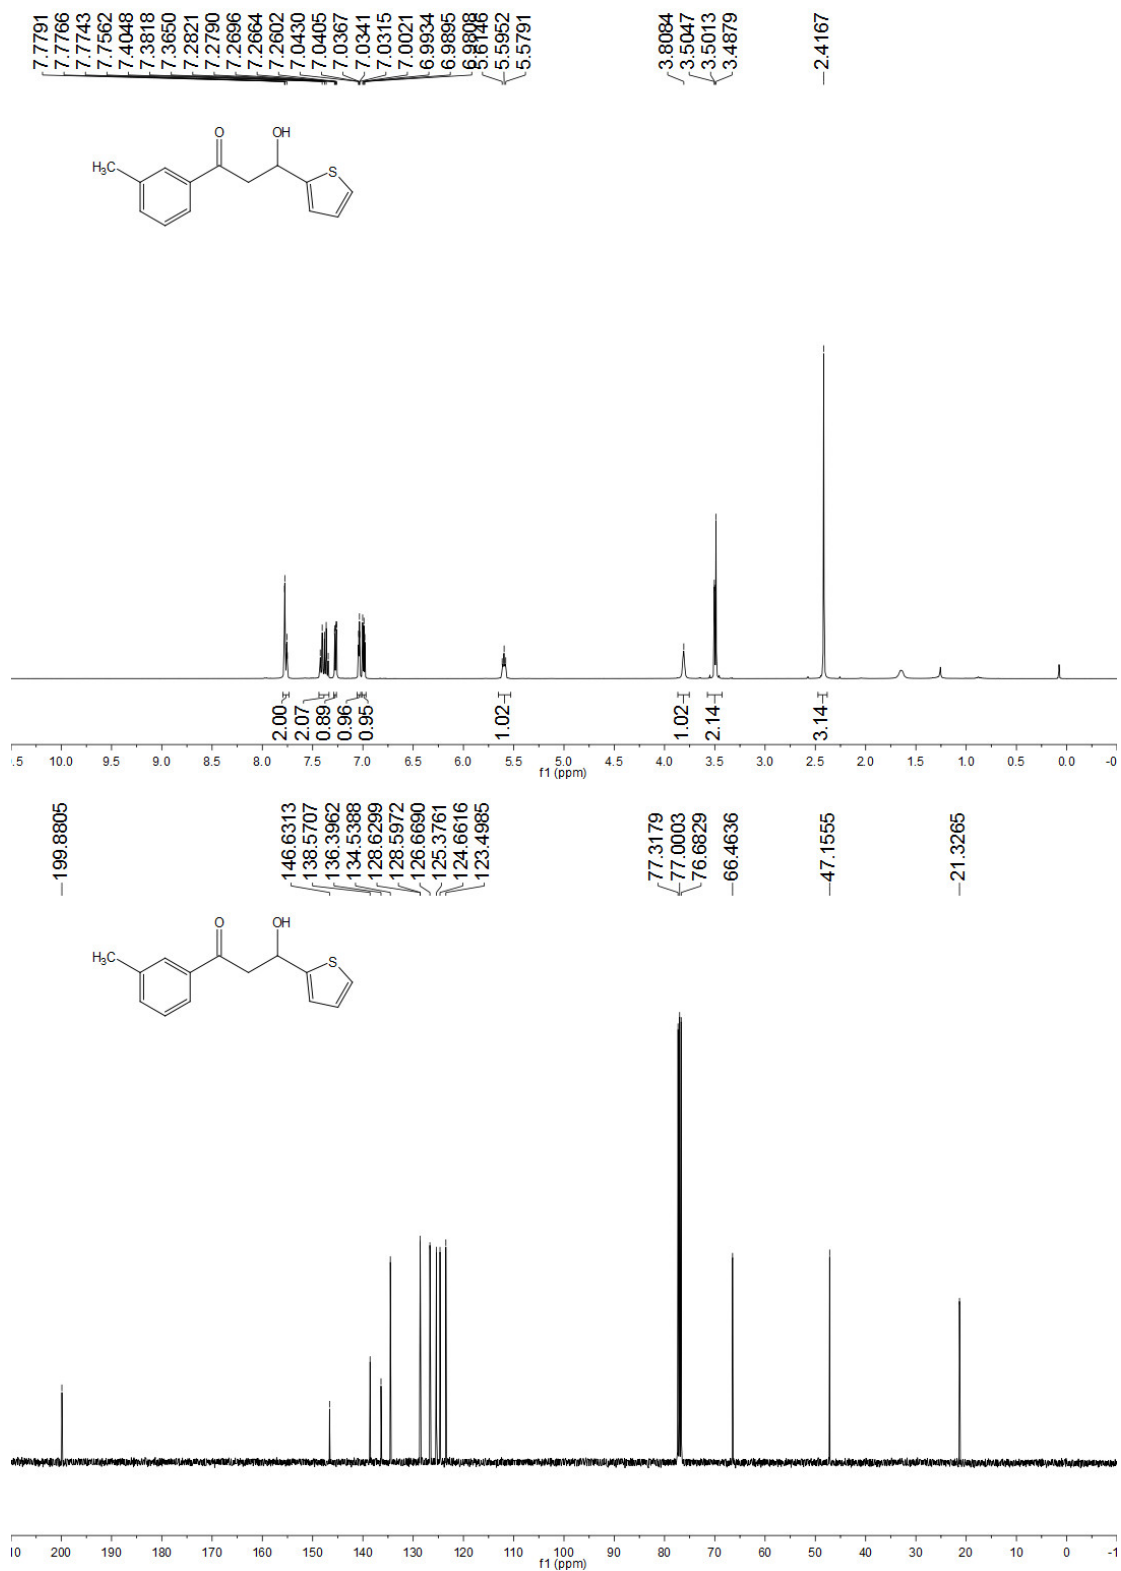

Figure S27. <sup>1</sup>H NMR and <sup>13</sup>C NMR spectra of 3y.
